# Supplementary material for: Finger Thickening during Extra-Heavy Oil Waterflooding: Simulation and Interpretation Using Pore-Scale Modelling
Source: PLoS One. 2017 Jan 25;12(1):e0169727. doi: 10.1371/journal.pone.0169727 (PMC5266317; doi:10.1371/journal.pone.0169727)
Supplement: S1 File — Dataset A: Represents the simulated water saturation at breakthrough versus capillary number plotted in Fig 18. Dataset B: Represents the simulated differential pressure for different networks lengths and the mean Pc in the network plotted in Fig 27. Dataset C: Represents the simulated differential pressure for different contact angles and the mean Pc in the network plotted in Fig 28. Dataset D: Represents the simulated differential for different injection rates and the mean capillary pressure in the network plotted in Fig 30. (XLSX) [file pone.0169727.s001.xlsx]

## Sheet: Sheet10
	PhysicalTime	391.509		PVinjected	0.00302914		Pinlet(Pa)	40811.6		CumProdInvading	(m3)	0		CumProdDefending	(m3)	5.4398e-10		waterCut(m3)	0
	PhysicalTime	672.64		PVinjected	0.00521246		Pinlet(Pa)	40553.3		CumProdInvading	(m3)	0		CumProdDefending	(m3)	9.34606e-10		waterCut(m3)	0
	PhysicalTime	947.691		PVinjected	0.00735001		Pinlet(Pa)	40180.8		CumProdInvading	(m3)	0		CumProdDefending	(m3)	1.31679e-09		waterCut(m3)	0
	PhysicalTime	1213.52		PVinjected	0.00942381		Pinlet(Pa)	39750		CumProdInvading	(m3)	0		CumProdDefending	(m3)	1.6862e-09		waterCut(m3)	0
	PhysicalTime	1505.17		PVinjected	0.0116935		Pinlet(Pa)	39283.5		CumProdInvading	(m3)	0		CumProdDefending	(m3)	2.09152e-09		waterCut(m3)	0
	PhysicalTime	1788.63		PVinjected	0.0138887		Pinlet(Pa)	38868.5		CumProdInvading	(m3)	0		CumProdDefending	(m3)	2.48545e-09		waterCut(m3)	0
	PhysicalTime	2079		PVinjected	0.0161398		Pinlet(Pa)	38217.9		CumProdInvading	(m3)	0		CumProdDefending	(m3)	2.88899e-09		waterCut(m3)	0
	PhysicalTime	2365.26		PVinjected	0.018364		Pinlet(Pa)	37702.8		CumProdInvading	(m3)	0		CumProdDefending	(m3)	3.28682e-09		waterCut(m3)	0
	PhysicalTime	2650.13		PVinjected	0.0205799		Pinlet(Pa)	37134.3		CumProdInvading	(m3)	0		CumProdDefending	(m3)	3.68276e-09		waterCut(m3)	0
	PhysicalTime	2935.01		PVinjected	0.0227997		Pinlet(Pa)	36651.9		CumProdInvading	(m3)	0		CumProdDefending	(m3)	4.07872e-09		waterCut(m3)	0
	PhysicalTime	3205.85		PVinjected	0.0249127		Pinlet(Pa)	36154.9		CumProdInvading	(m3)	0		CumProdDefending	(m3)	4.45512e-09		waterCut(m3)	0
	PhysicalTime	3485.96		PVinjected	0.0270998		Pinlet(Pa)	35402.6		CumProdInvading	(m3)	0		CumProdDefending	(m3)	4.84441e-09		waterCut(m3)	0
	PhysicalTime	3794.55		PVinjected	0.0294946		Pinlet(Pa)	34737.3		CumProdInvading	(m3)	0		CumProdDefending	(m3)	5.2733e-09		waterCut(m3)	0
	PhysicalTime	4087.99		PVinjected	0.0317686		Pinlet(Pa)	34343.3		CumProdInvading	(m3)	0		CumProdDefending	(m3)	5.68115e-09		waterCut(m3)	0
	PhysicalTime	4355.3		PVinjected	0.0338405		Pinlet(Pa)	33822.9		CumProdInvading	(m3)	0		CumProdDefending	(m3)	6.0527e-09		waterCut(m3)	0
	PhysicalTime	4648.75		PVinjected	0.0361151		Pinlet(Pa)	33202.2		CumProdInvading	(m3)	0		CumProdDefending	(m3)	6.4606e-09		waterCut(m3)	0
	PhysicalTime	4926.43		PVinjected	0.0382692		Pinlet(Pa)	32649.1		CumProdInvading	(m3)	0		CumProdDefending	(m3)	6.84658e-09		waterCut(m3)	0
	PhysicalTime	5203.86		PVinjected	0.0404226		Pinlet(Pa)	32108.1		CumProdInvading	(m3)	0		CumProdDefending	(m3)	7.23222e-09		waterCut(m3)	0
	PhysicalTime	5472.89		PVinjected	0.0425123		Pinlet(Pa)	31598.8		CumProdInvading	(m3)	0		CumProdDefending	(m3)	7.60617e-09		waterCut(m3)	0
	PhysicalTime	5734.4		PVinjected	0.0445433		Pinlet(Pa)	30909.5		CumProdInvading	(m3)	0		CumProdDefending	(m3)	7.96967e-09		waterCut(m3)	0
	PhysicalTime	6020.53		PVinjected	0.0467654		Pinlet(Pa)	30265.2		CumProdInvading	(m3)	0		CumProdDefending	(m3)	8.36739e-09		waterCut(m3)	0
	PhysicalTime	6323.2		PVinjected	0.0491164		Pinlet(Pa)	29695.6		CumProdInvading	(m3)	0		CumProdDefending	(m3)	8.78815e-09		waterCut(m3)	0
	PhysicalTime	6595.48		PVinjected	0.0512318		Pinlet(Pa)	28941.5		CumProdInvading	(m3)	0		CumProdDefending	(m3)	9.16666e-09		waterCut(m3)	0
	PhysicalTime	6862.52		PVinjected	0.0533074		Pinlet(Pa)	28252.4		CumProdInvading	(m3)	0		CumProdDefending	(m3)	9.53791e-09		waterCut(m3)	0
	PhysicalTime	7145.35		PVinjected	0.0555065		Pinlet(Pa)	27696		CumProdInvading	(m3)	0		CumProdDefending	(m3)	9.93112e-09		waterCut(m3)	0
	PhysicalTime	7444.47		PVinjected	0.0578318		Pinlet(Pa)	26910.8		CumProdInvading	(m3)	0		CumProdDefending	(m3)	1.0347e-08		waterCut(m3)	0
	PhysicalTime	7742.05		PVinjected	0.0601446		Pinlet(Pa)	26184.2		CumProdInvading	(m3)	0		CumProdDefending	(m3)	1.07607e-08		waterCut(m3)	0
	PhysicalTime	8011.6		PVinjected	0.0622393		Pinlet(Pa)	25517		CumProdInvading	(m3)	0		CumProdDefending	(m3)	1.11355e-08		waterCut(m3)	0
	PhysicalTime	8278.18		PVinjected	0.0643117		Pinlet(Pa)	24764.9		CumProdInvading	(m3)	0		CumProdDefending	(m3)	1.15061e-08		waterCut(m3)	0
	PhysicalTime	8540.63		PVinjected	0.0663518		Pinlet(Pa)	24037.9		CumProdInvading	(m3)	0		CumProdDefending	(m3)	1.1871e-08		waterCut(m3)	0
	PhysicalTime	8828.62		PVinjected	0.0685925		Pinlet(Pa)	23362.8		CumProdInvading	(m3)	0		CumProdDefending	(m3)	1.22714e-08		waterCut(m3)	0
	PhysicalTime	9122.94		PVinjected	0.0708835		Pinlet(Pa)	22812		CumProdInvading	(m3)	0		CumProdDefending	(m3)	1.26807e-08		waterCut(m3)	0
	PhysicalTime	9414.45		PVinjected	0.0731541		Pinlet(Pa)	22269.1		CumProdInvading	(m3)	0		CumProdDefending	(m3)	1.30861e-08		waterCut(m3)	0
	PhysicalTime	9705.84		PVinjected	0.0754248		Pinlet(Pa)	21570.2		CumProdInvading	(m3)	0		CumProdDefending	(m3)	1.34914e-08		waterCut(m3)	0
	PhysicalTime	9971.26		PVinjected	0.0774923		Pinlet(Pa)	20819.6		CumProdInvading	(m3)	0		CumProdDefending	(m3)	1.38605e-08		waterCut(m3)	0
	PhysicalTime	10260.8		PVinjected	0.0797513		Pinlet(Pa)	20131.4		CumProdInvading	(m3)	0		CumProdDefending	(m3)	1.42632e-08		waterCut(m3)	0
	PhysicalTime	10531.9		PVinjected	0.0818662		Pinlet(Pa)	19592.6		CumProdInvading	(m3)	0		CumProdDefending	(m3)	1.46402e-08		waterCut(m3)	0
	PhysicalTime	10811.8		PVinjected	0.0840513		Pinlet(Pa)	19091.8		CumProdInvading	(m3)	0		CumProdDefending	(m3)	1.50296e-08		waterCut(m3)	0
	PhysicalTime	11069.1		PVinjected	0.0860613		Pinlet(Pa)	18392.1		CumProdInvading	(m3)	0		CumProdDefending	(m3)	1.53876e-08		waterCut(m3)	0
	PhysicalTime	11346.2		PVinjected	0.0882255		Pinlet(Pa)	17711		CumProdInvading	(m3)	0		CumProdDefending	(m3)	1.5773e-08		waterCut(m3)	0
	PhysicalTime	11624.1		PVinjected	0.0903948		Pinlet(Pa)	17181.2		CumProdInvading	(m3)	0		CumProdDefending	(m3)	1.61595e-08		waterCut(m3)	0
	PhysicalTime	11904.9		PVinjected	0.092577		Pinlet(Pa)	16417.4		CumProdInvading	(m3)	0		CumProdDefending	(m3)	1.65502e-08		waterCut(m3)	0
	PhysicalTime	12195.6		PVinjected	0.0948331		Pinlet(Pa)	15680.4		CumProdInvading	(m3)	0		CumProdDefending	(m3)	1.69546e-08		waterCut(m3)	0
	PhysicalTime	12481.5		PVinjected	0.0970529		Pinlet(Pa)	15066.1		CumProdInvading	(m3)	0		CumProdDefending	(m3)	1.73524e-08		waterCut(m3)	0
	PhysicalTime	12766.8		PVinjected	0.0992689		Pinlet(Pa)	14378.9		CumProdInvading	(m3)	0		CumProdDefending	(m3)	1.77494e-08		waterCut(m3)	0
	PhysicalTime	13020.4		PVinjected	0.101239		Pinlet(Pa)	13633.6		CumProdInvading	(m3)	0		CumProdDefending	(m3)	1.81023e-08		waterCut(m3)	0
	PhysicalTime	13318		PVinjected	0.103551		Pinlet(Pa)	12781.4		CumProdInvading	(m3)	0		CumProdDefending	(m3)	1.85163e-08		waterCut(m3)	0
	PhysicalTime	13602.9		PVinjected	0.105765		Pinlet(Pa)	12251.5		CumProdInvading	(m3)	0		CumProdDefending	(m3)	1.89127e-08		waterCut(m3)	0
	PhysicalTime	13884.1		PVinjected	0.107951		Pinlet(Pa)	11492.6		CumProdInvading	(m3)	0		CumProdDefending	(m3)	1.93042e-08		waterCut(m3)	0
	PhysicalTime	14163.2		PVinjected	0.110121		Pinlet(Pa)	10930.9		CumProdInvading	(m3)	0		CumProdDefending	(m3)	1.96927e-08		waterCut(m3)	0
	PhysicalTime	14429.5		PVinjected	0.112191		Pinlet(Pa)	10270.6		CumProdInvading	(m3)	0		CumProdDefending	(m3)	2.00633e-08		waterCut(m3)	0
	PhysicalTime	14713.4		PVinjected	0.114399		Pinlet(Pa)	9653.09		CumProdInvading	(m3)	0		CumProdDefending	(m3)	2.04585e-08		waterCut(m3)	0
	PhysicalTime	14965.7		PVinjected	0.116364		Pinlet(Pa)	8982.71		CumProdInvading	(m3)	0		CumProdDefending	(m3)	2.08099e-08		waterCut(m3)	0
	PhysicalTime	15238.7		PVinjected	0.118491		Pinlet(Pa)	8261.71		CumProdInvading	(m3)	0		CumProdDefending	(m3)	2.11903e-08		waterCut(m3)	0
	PhysicalTime	15510.4		PVinjected	0.120608		Pinlet(Pa)	7562.84		CumProdInvading	(m3)	0		CumProdDefending	(m3)	2.15689e-08		waterCut(m3)	0
	PhysicalTime	15803.6		PVinjected	0.122894		Pinlet(Pa)	6602.89		CumProdInvading	(m3)	0		CumProdDefending	(m3)	2.19775e-08		waterCut(m3)	0
	PhysicalTime	16096.5		PVinjected	0.125187		Pinlet(Pa)	5920.78		CumProdInvading	(m3)	0		CumProdDefending	(m3)	2.23873e-08		waterCut(m3)	0
	PhysicalTime	16351.4		PVinjected	0.127227		Pinlet(Pa)	4711.78		CumProdInvading	(m3)	0		CumProdDefending	(m3)	2.27518e-08		waterCut(m3)	0
	PhysicalTime	31189.8		PVinjected	0.232726		Pinlet(Pa)	695.942		CumProdInvading	(m3)	1.8582e-08		CumProdDefending	(m3)	2.31107e-08		waterCut(m3)	0.990162
	PhysicalTime	59199.8		PVinjected	0.431329		Pinlet(Pa)	696.017		CumProdInvading	(m3)	5.39221e-08		CumProdDefending	(m3)	2.34327e-08		waterCut(m3)	0.99209
	PhysicalTime	87838.9		PVinjected	0.634171		Pinlet(Pa)	696.059		CumProdInvading	(m3)	9.0064e-08		CumProdDefending	(m3)	2.37145e-08		waterCut(m3)	0.993179
	PhysicalTime	122227		PVinjected	0.877632		Pinlet(Pa)	695.839		CumProdInvading	(m3)	1.33456e-07		CumProdDefending	(m3)	2.40404e-08		waterCut(m3)	0.993071
	PhysicalTime	155741		PVinjected	1.11478		Pinlet(Pa)	695.771		CumProdInvading	(m3)	1.75733e-07		CumProdDefending	(m3)	2.43465e-08		waterCut(m3)	0.993323
	PhysicalTime	192278		PVinjected	1.37336		Pinlet(Pa)	695.605		CumProdInvading	(m3)	2.21815e-07		CumProdDefending	(m3)	2.46979e-08		waterCut(m3)	0.993549
	PhysicalTime	229892		PVinjected	1.63938		Pinlet(Pa)	695.377		CumProdInvading	(m3)	2.69247e-07		CumProdDefending	(m3)	2.5031e-08		waterCut(m3)	0.993851
	PhysicalTime	263456		PVinjected	1.87676		Pinlet(Pa)	695.024		CumProdInvading	(m3)	3.11548e-07		CumProdDefending	(m3)	2.53562e-08		waterCut(m3)	0.992569
	PhysicalTime	299464		PVinjected	2.13122		Pinlet(Pa)	694.829		CumProdInvading	(m3)	3.56917e-07		CumProdDefending	(m3)	2.56782e-08		waterCut(m3)	0.99432
	PhysicalTime	333228		PVinjected	2.36989		Pinlet(Pa)	694.124		CumProdInvading	(m3)	3.99433e-07		CumProdDefending	(m3)	2.60162e-08		waterCut(m3)	0.991483
	PhysicalTime	364596		PVinjected	2.59153		Pinlet(Pa)	693.905		CumProdInvading	(m3)	4.38904e-07		CumProdDefending	(m3)	2.63413e-08		waterCut(m3)	0.991924
	PhysicalTime	396702		PVinjected	2.81839		Pinlet(Pa)	693.091		CumProdInvading	(m3)	4.79278e-07		CumProdDefending	(m3)	2.66996e-08		waterCut(m3)	0.990755
	PhysicalTime	428390		PVinjected	3.04209		Pinlet(Pa)	692.897		CumProdInvading	(m3)	5.19106e-07		CumProdDefending	(m3)	2.704e-08		waterCut(m3)	0.989534
	PhysicalTime	459259		PVinjected	3.25983		Pinlet(Pa)	692.022		CumProdInvading	(m3)	5.57872e-07		CumProdDefending	(m3)	2.73728e-08		waterCut(m3)	0.990239
	PhysicalTime	484193		PVinjected	3.43576		Pinlet(Pa)	690.339		CumProdInvading	(m3)	5.89109e-07		CumProdDefending	(m3)	2.77231e-08		waterCut(m3)	0.989158
	PhysicalTime	510299		PVinjected	3.61963		Pinlet(Pa)	689.57		CumProdInvading	(m3)	6.21762e-07		CumProdDefending	(m3)	2.80851e-08		waterCut(m3)	0.98761
	PhysicalTime	532001		PVinjected	3.77251		Pinlet(Pa)	687.352		CumProdInvading	(m3)	6.48864e-07		CumProdDefending	(m3)	2.84315e-08		waterCut(m3)	0.98596
	PhysicalTime	555486		PVinjected	3.93751		Pinlet(Pa)	687.699		CumProdInvading	(m3)	6.78169e-07		CumProdDefending	(m3)	2.87517e-08		waterCut(m3)	0.98853
	PhysicalTime	579934		PVinjected	4.10918		Pinlet(Pa)	687.546		CumProdInvading	(m3)	7.0865e-07		CumProdDefending	(m3)	2.90923e-08		waterCut(m3)	0.989177
	PhysicalTime	607986		PVinjected	4.30567		Pinlet(Pa)	687.095		CumProdInvading	(m3)	7.43613e-07		CumProdDefending	(m3)	2.94107e-08		waterCut(m3)	0.991348
	PhysicalTime	631198		PVinjected	4.46833		Pinlet(Pa)	685.192		CumProdInvading	(m3)	7.72494e-07		CumProdDefending	(m3)	2.97366e-08		waterCut(m3)	0.984343
	PhysicalTime	648286		PVinjected	4.58835		Pinlet(Pa)	680.084		CumProdInvading	(m3)	7.93653e-07		CumProdDefending	(m3)	3.01288e-08		waterCut(m3)	0.977496
	PhysicalTime	664296		PVinjected	4.70083		Pinlet(Pa)	754.317		CumProdInvading	(m3)	8.1347e-07		CumProdDefending	(m3)	3.05084e-08		waterCut(m3)	0.980764
	PhysicalTime	676415		PVinjected	4.78624		Pinlet(Pa)	672.317		CumProdInvading	(m3)	8.2845e-07		CumProdDefending	(m3)	3.08651e-08		waterCut(m3)	0.974561
	PhysicalTime	684242		PVinjected	4.84155		Pinlet(Pa)	609.059		CumProdInvading	(m3)	8.37982e-07		CumProdDefending	(m3)	3.12449e-08		waterCut(m3)	0.880557
					5			350

## Sheet: Dataset A
	N simulation	Q cc/hr	Nca	Sw
	1	5e-05	3.4625e-11	0.24
	2	0.0005	3.4625e-10	0.22
	3	0.001	6.925e-10	0.185
	4	0.005	3.4625e-09	0.097
	5	0.01	6.925e-09	0.09
	6	0.05	3.4625e-08	0.093
	7	0.1	6.925e-08	0.093
	8	0.5	3.4625e-07	0.0896
	9	1	6.925e-07	0.0911
	10	10	6.925e-06	0.0964

## Sheet: Dataset B
		L=3.5 cm									L=15 cm								L=7.5 cm							L=30 cm
																																		Mean Pc
			0.00579907		Pinlet(Pa)	20112.6					PVinjected	0.0013934		Pinlet(Pa)	81116.7				PVinjected	0.00302914		Pinlet(Pa)	40811.6			PVinjected	0.00069548		Pinlet(Pa)	160292				0	554
			0.0101575		Pinlet(Pa)	19889.8					PVinjected	0.00260584		Pinlet(Pa)	80808.4				PVinjected	0.00521246		Pinlet(Pa)	40553.3			PVinjected	0.00128713		Pinlet(Pa)	159977				6	554
			0.0146763		Pinlet(Pa)	19518.2					PVinjected	0.00362446		Pinlet(Pa)	80377.8				PVinjected	0.00735001		Pinlet(Pa)	40180.8			PVinjected	0.00184846		Pinlet(Pa)	159549
			0.0191793		Pinlet(Pa)	19124.7					PVinjected	0.00478104		Pinlet(Pa)	79910.2				PVinjected	0.00942381		Pinlet(Pa)	39750			PVinjected	0.00244854		Pinlet(Pa)	159089
			0.0232489		Pinlet(Pa)	18720.5					PVinjected	0.00591819		Pinlet(Pa)	79531.6				PVinjected	0.0116935		Pinlet(Pa)	39283.5			PVinjected	0.00300636		Pinlet(Pa)	158775
			0.027761		Pinlet(Pa)	18322.7					PVinjected	0.0070979		Pinlet(Pa)	79077.8				PVinjected	0.0138887		Pinlet(Pa)	38868.5			PVinjected	0.00358838		Pinlet(Pa)	158430
			0.0321281		Pinlet(Pa)	17765.3					PVinjected	0.00811218		Pinlet(Pa)	78670				PVinjected	0.0161398		Pinlet(Pa)	38217.9			PVinjected	0.00412842		Pinlet(Pa)	157965
			0.036436		Pinlet(Pa)	17284.8					PVinjected	0.00920253		Pinlet(Pa)	78177.1				PVinjected	0.018364		Pinlet(Pa)	37702.8			PVinjected	0.00466751		Pinlet(Pa)	157419
			0.0404059		Pinlet(Pa)	16818.2					PVinjected	0.0102504		Pinlet(Pa)	77604.7				PVinjected	0.0205799		Pinlet(Pa)	37134.3			PVinjected	0.0051874		Pinlet(Pa)	156983
			0.0448036		Pinlet(Pa)	16250.8					PVinjected	0.0114196		Pinlet(Pa)	77097.1				PVinjected	0.0227997		Pinlet(Pa)	36651.9			PVinjected	0.00573519		Pinlet(Pa)	156192
			0.0492862		Pinlet(Pa)	15774.9					PVinjected	0.0125036		Pinlet(Pa)	76503.2				PVinjected	0.0249127		Pinlet(Pa)	36154.9			PVinjected	0.00631257		Pinlet(Pa)	155657
			0.0534614		Pinlet(Pa)	15218.6					PVinjected	0.0135922		Pinlet(Pa)	75950.3				PVinjected	0.0270998		Pinlet(Pa)	35402.6			PVinjected	0.00687315		Pinlet(Pa)	155161
			0.0580843		Pinlet(Pa)	14554					PVinjected	0.0147661		Pinlet(Pa)	75315.5				PVinjected	0.0294946		Pinlet(Pa)	34737.3			PVinjected	0.00740794		Pinlet(Pa)	154580
			0.0625591		Pinlet(Pa)	14089.4					PVinjected	0.0158162		Pinlet(Pa)	74841.8				PVinjected	0.0317686		Pinlet(Pa)	34343.3			PVinjected	0.00793971		Pinlet(Pa)	154113
			0.0668357		Pinlet(Pa)	13405.8					PVinjected	0.0168183		Pinlet(Pa)	74120.7				PVinjected	0.0338405		Pinlet(Pa)	33822.9			PVinjected	0.0085509		Pinlet(Pa)	153562
			0.0710683		Pinlet(Pa)	12813.4					PVinjected	0.0178854		Pinlet(Pa)	73460.3				PVinjected	0.0361151		Pinlet(Pa)	33202.2			PVinjected	0.00907997		Pinlet(Pa)	152918
			0.0754952		Pinlet(Pa)	12031.4					PVinjected	0.0189562		Pinlet(Pa)	72907.3				PVinjected	0.0382692		Pinlet(Pa)	32649.1			PVinjected	0.00966042		Pinlet(Pa)	152450
			0.0799448		Pinlet(Pa)	11411.3					PVinjected	0.0201397		Pinlet(Pa)	72364.1				PVinjected	0.0404226		Pinlet(Pa)	32108.1			PVinjected	0.0101666		Pinlet(Pa)	151873
			0.084307		Pinlet(Pa)	10800.1					PVinjected	0.0212738		Pinlet(Pa)	71753.5				PVinjected	0.0425123		Pinlet(Pa)	31598.8			PVinjected	0.0107302		Pinlet(Pa)	151392
			0.0886115		Pinlet(Pa)	10284.8					PVinjected	0.0223116		Pinlet(Pa)	71148.8				PVinjected	0.0445433		Pinlet(Pa)	30909.5			PVinjected	0.0113005		Pinlet(Pa)	150834
			0.0928828		Pinlet(Pa)	9860.01					PVinjected	0.0233502		Pinlet(Pa)	70605				PVinjected	0.0467654		Pinlet(Pa)	30265.2			PVinjected	0.0118363		Pinlet(Pa)	150396
			0.0972737		Pinlet(Pa)	9353.16					PVinjected	0.0244338		Pinlet(Pa)	69785.9				PVinjected	0.0491164		Pinlet(Pa)	29695.6			PVinjected	0.012396		Pinlet(Pa)	149832
			0.10152		Pinlet(Pa)	8918.64					PVinjected	0.0255275		Pinlet(Pa)	69046.7				PVinjected	0.0512318		Pinlet(Pa)	28941.5			PVinjected	0.0129302		Pinlet(Pa)	149266
			0.106194		Pinlet(Pa)	8310.24					PVinjected	0.0265496		Pinlet(Pa)	68250.4				PVinjected	0.0533074		Pinlet(Pa)	28252.4			PVinjected	0.0134773		Pinlet(Pa)	148802
			0.110538		Pinlet(Pa)	7808.49					PVinjected	0.0276317		Pinlet(Pa)	67475.5				PVinjected	0.0555065		Pinlet(Pa)	27696			PVinjected	0.0140143		Pinlet(Pa)	148194
			0.114776		Pinlet(Pa)	7406.86					PVinjected	0.0287249		Pinlet(Pa)	66624.8				PVinjected	0.0578318		Pinlet(Pa)	26910.8			PVinjected	0.0145637		Pinlet(Pa)	147610
			0.118926		Pinlet(Pa)	6945.25					PVinjected	0.0298643		Pinlet(Pa)	65927.2				PVinjected	0.0601446		Pinlet(Pa)	26184.2			PVinjected	0.015124		Pinlet(Pa)	146933
			0.123203		Pinlet(Pa)	6087.72					PVinjected	0.0310067		Pinlet(Pa)	65263.4				PVinjected	0.0622393		Pinlet(Pa)	25517			PVinjected	0.0156191		Pinlet(Pa)	146212
			0.127426		Pinlet(Pa)	6087.72					PVinjected	0.0321406		Pinlet(Pa)	64566.1				PVinjected	0.0643117		Pinlet(Pa)	24764.9			PVinjected	0.0161718		Pinlet(Pa)	145549
			0.132013		Pinlet(Pa)	5337.38					PVinjected	0.03325		Pinlet(Pa)	63941				PVinjected	0.0663518		Pinlet(Pa)	24037.9			PVinjected	0.0167044		Pinlet(Pa)	144953
			0.136407		Pinlet(Pa)	4680.83					PVinjected	0.0343563		Pinlet(Pa)	63360				PVinjected	0.0685925		Pinlet(Pa)	23362.8			PVinjected	0.0172725		Pinlet(Pa)	144438
		PVinjected	0.140851		Pinlet(Pa)	4106.35					PVinjected	0.0354963		Pinlet(Pa)	62479.3				PVinjected	0.0708835		Pinlet(Pa)	22812			PVinjected	0.0178442		Pinlet(Pa)	143629
		PVinjected	0.144949		Pinlet(Pa)	3603.68					PVinjected	0.0365581		Pinlet(Pa)	61556.9				PVinjected	0.0731541		Pinlet(Pa)	22269.1			PVinjected	0.0183822		Pinlet(Pa)	143029
		PVinjected	0.148862		Pinlet(Pa)	3163.84					PVinjected	0.0376931		Pinlet(Pa)	60564.5				PVinjected	0.0754248		Pinlet(Pa)	21570.2			PVinjected	0.0189022		Pinlet(Pa)	142169
		PVinjected	0.153419		Pinlet(Pa)	2778.99					PVinjected	0.0387155		Pinlet(Pa)	59745.6				PVinjected	0.0774923		Pinlet(Pa)	20819.6			PVinjected	0.0194192		Pinlet(Pa)	141179
		PVinjected	0.205374		Pinlet(Pa)	347.661					PVinjected	0.0398143		Pinlet(Pa)	58802.3				PVinjected	0.0797513		Pinlet(Pa)	20131.4			PVinjected	0.019949		Pinlet(Pa)	140373
			0.5			347.661					PVinjected	0.0409325		Pinlet(Pa)	57884.9				PVinjected	0.0818662		Pinlet(Pa)	19592.6			PVinjected	0.0205289		Pinlet(Pa)	139233
			1			347.661					PVinjected	0.0420201		Pinlet(Pa)	57344.9				PVinjected	0.0840513		Pinlet(Pa)	19091.8			PVinjected	0.021108		Pinlet(Pa)	138534
			2			347.661					PVinjected	0.0430428		Pinlet(Pa)	56610.8				PVinjected	0.0860613		Pinlet(Pa)	18392.1			PVinjected	0.0216141		Pinlet(Pa)	137602
			5			347.661					PVinjected	0.0441568		Pinlet(Pa)	55937.3				PVinjected	0.0882255		Pinlet(Pa)	17711			PVinjected	0.0221766		Pinlet(Pa)	136591
											PVinjected	0.045223		Pinlet(Pa)	55124.4				PVinjected	0.0903948		Pinlet(Pa)	17181.2			PVinjected	0.0226952		Pinlet(Pa)	135883
											PVinjected	0.0463545		Pinlet(Pa)	54484.2				PVinjected	0.092577		Pinlet(Pa)	16417.4			PVinjected	0.0232316		Pinlet(Pa)	135193
											PVinjected	0.047368		Pinlet(Pa)	53906.7				PVinjected	0.0948331		Pinlet(Pa)	15680.4			PVinjected	0.023751		Pinlet(Pa)	134561
											PVinjected	0.0484738		Pinlet(Pa)	53177.8				PVinjected	0.0970529		Pinlet(Pa)	15066.1			PVinjected	0.0242951		Pinlet(Pa)	133787
											PVinjected	0.0495055		Pinlet(Pa)	52580.7				PVinjected	0.0992689		Pinlet(Pa)	14378.9			PVinjected	0.0248085		Pinlet(Pa)	132929
											PVinjected	0.0504587		Pinlet(Pa)	51957.8				PVinjected	0.101239		Pinlet(Pa)	13633.6			PVinjected	0.0253173		Pinlet(Pa)	132245
											PVinjected	0.0515118		Pinlet(Pa)	51120				PVinjected	0.103551		Pinlet(Pa)	12781.4			PVinjected	0.0258319		Pinlet(Pa)	131470
											PVinjected	0.0524963		Pinlet(Pa)	50429				PVinjected	0.105765		Pinlet(Pa)	12251.5			PVinjected	0.0263932		Pinlet(Pa)	130779
											PVinjected	0.0536156		Pinlet(Pa)	49498.6				PVinjected	0.107951		Pinlet(Pa)	11492.6			PVinjected	0.0268859		Pinlet(Pa)	129939
											PVinjected	0.0546325		Pinlet(Pa)	48701.4				PVinjected	0.110121		Pinlet(Pa)	10930.9			PVinjected	0.0274229		Pinlet(Pa)	129213
											PVinjected	0.0556864		Pinlet(Pa)	47606				PVinjected	0.112191		Pinlet(Pa)	10270.6			PVinjected	0.0279657		Pinlet(Pa)	128713
											PVinjected	0.0568424		Pinlet(Pa)	46822.6				PVinjected	0.114399		Pinlet(Pa)	9653.09			PVinjected	0.0285107		Pinlet(Pa)	128011
											PVinjected	0.0579411		Pinlet(Pa)	46296.4				PVinjected	0.116364		Pinlet(Pa)	8982.71			PVinjected	0.0290093		Pinlet(Pa)	127381
											PVinjected	0.0589872		Pinlet(Pa)	45479.6				PVinjected	0.118491		Pinlet(Pa)	8261.71			PVinjected	0.029541		Pinlet(Pa)	126666
											PVinjected	0.0600784		Pinlet(Pa)	44578.8				PVinjected	0.120608		Pinlet(Pa)	7562.84			PVinjected	0.0300853		Pinlet(Pa)	126137
											PVinjected	0.0611788		Pinlet(Pa)	43776.9				PVinjected	0.122894		Pinlet(Pa)	6602.89			PVinjected	0.0305968		Pinlet(Pa)	125355
											PVinjected	0.0622422		Pinlet(Pa)	42998.4				PVinjected	0.125187		Pinlet(Pa)	5920.78			PVinjected	0.0311105		Pinlet(Pa)	124508
											PVinjected	0.0632879		Pinlet(Pa)	42001.2				PVinjected	0.127227		Pinlet(Pa)	4711.78			PVinjected	0.0316504		Pinlet(Pa)	123890
											PVinjected	0.0643415		Pinlet(Pa)	41069.7				PVinjected	0.232726		Pinlet(Pa)	695.942			PVinjected	0.0321698		Pinlet(Pa)	123175
											PVinjected	0.0653415		Pinlet(Pa)	40273.3				PVinjected	0.431329		Pinlet(Pa)	696.017			PVinjected	0.0327076		Pinlet(Pa)	122196
											PVinjected	0.0664375		Pinlet(Pa)	39448.5				PVinjected	0.634171		Pinlet(Pa)	696.059			PVinjected	0.0332201		Pinlet(Pa)	121413
											PVinjected	0.0674874		Pinlet(Pa)	38534.5				PVinjected	0.877632		Pinlet(Pa)	695.839			PVinjected	0.0337865		Pinlet(Pa)	120878
											PVinjected	0.0686314		Pinlet(Pa)	36978.1				PVinjected	1.11478		Pinlet(Pa)	695.771			PVinjected	0.0343343		Pinlet(Pa)	120387
											PVinjected	0.0696486		Pinlet(Pa)	36145.8				PVinjected	1.37336		Pinlet(Pa)	695.605			PVinjected	0.0348662		Pinlet(Pa)	119582
											PVinjected	0.0706488		Pinlet(Pa)	35200.4				PVinjected	1.63938		Pinlet(Pa)	695.377			PVinjected	0.0354201		Pinlet(Pa)	118838
											PVinjected	0.0717207		Pinlet(Pa)	34369.6				PVinjected	1.87676		Pinlet(Pa)	695.024			PVinjected	0.0359391		Pinlet(Pa)	118259
											PVinjected	0.0727946		Pinlet(Pa)	32961.1				PVinjected	2.13122		Pinlet(Pa)	694.829			PVinjected	0.0365213		Pinlet(Pa)	117518
											PVinjected	0.0738607		Pinlet(Pa)	32226.1				PVinjected	2.36989		Pinlet(Pa)	694.124			PVinjected	0.037073		Pinlet(Pa)	116883
											PVinjected	0.074949		Pinlet(Pa)	31452.7				PVinjected	2.59153		Pinlet(Pa)	693.905			PVinjected	0.0376073		Pinlet(Pa)	116345
											PVinjected	0.076024		Pinlet(Pa)	30537.1				PVinjected	2.81839		Pinlet(Pa)	693.091			PVinjected	0.0381168		Pinlet(Pa)	115812
											PVinjected	0.077081		Pinlet(Pa)	30007.1				PVinjected	3.04209		Pinlet(Pa)	692.897			PVinjected	0.0386182		Pinlet(Pa)	115249
											PVinjected	0.0781796		Pinlet(Pa)	29139.9				PVinjected	3.25983		Pinlet(Pa)	692.022			PVinjected	0.0391395		Pinlet(Pa)	114743
											PVinjected	0.0793605		Pinlet(Pa)	28232.2				PVinjected	3.43576		Pinlet(Pa)	690.339			PVinjected	0.0396709		Pinlet(Pa)	114161
											PVinjected	0.08043		Pinlet(Pa)	27515.2				PVinjected	3.61963		Pinlet(Pa)	689.57			PVinjected	0.0401887		Pinlet(Pa)	113716
											PVinjected	0.0814996		Pinlet(Pa)	26830.3				PVinjected	3.77251		Pinlet(Pa)	687.352			PVinjected	0.0407219		Pinlet(Pa)	113067
											PVinjected	0.0825792		Pinlet(Pa)	26051.3				PVinjected	3.93751		Pinlet(Pa)	687.699			PVinjected	0.0412695		Pinlet(Pa)	112549
											PVinjected	0.0837047		Pinlet(Pa)	25109.9				PVinjected	4.10918		Pinlet(Pa)	687.546			PVinjected	0.0417991		Pinlet(Pa)	111614
											PVinjected	0.084778		Pinlet(Pa)	24136.8				PVinjected	4.30567		Pinlet(Pa)	687.095			PVinjected	0.0423262		Pinlet(Pa)	111046
											PVinjected	0.0858747		Pinlet(Pa)	23270.3				PVinjected	4.46833		Pinlet(Pa)	685.192			PVinjected	0.0428431		Pinlet(Pa)	110169
											PVinjected	0.0869636		Pinlet(Pa)	22699				PVinjected	4.58835		Pinlet(Pa)	680.084			PVinjected	0.0434004		Pinlet(Pa)	109495
											PVinjected	0.0879264		Pinlet(Pa)	21972.7				PVinjected	4.70083		Pinlet(Pa)	754.317			PVinjected	0.0439041		Pinlet(Pa)	108944
											PVinjected	0.0890114		Pinlet(Pa)	21124.7				PVinjected	4.78624		Pinlet(Pa)	672.317			PVinjected	0.0444654		Pinlet(Pa)	108480
											PVinjected	0.0900301		Pinlet(Pa)	20396.5				PVinjected	4.84155		Pinlet(Pa)	609.059			PVinjected	0.0449972		Pinlet(Pa)	107953
											PVinjected	0.0910907		Pinlet(Pa)	19805.2											PVinjected	0.0455634		Pinlet(Pa)	107275
											PVinjected	0.0922046		Pinlet(Pa)	19232.2											PVinjected	0.0461287		Pinlet(Pa)	106531
											PVinjected	0.0932965		Pinlet(Pa)	18596.3											PVinjected	0.0466001		Pinlet(Pa)	105997
											PVinjected	0.0943363		Pinlet(Pa)	17957.8											PVinjected	0.0471635		Pinlet(Pa)	105462
											PVinjected	0.0953911		Pinlet(Pa)	17279.2											PVinjected	0.0477235		Pinlet(Pa)	104657
											PVinjected	0.0964406		Pinlet(Pa)	16435.3											PVinjected	0.0482846		Pinlet(Pa)	104024
											PVinjected	0.0974686		Pinlet(Pa)	15630.4											PVinjected	0.04879		Pinlet(Pa)	103375
											PVinjected	0.0984526		Pinlet(Pa)	14911.1											PVinjected	0.0493391		Pinlet(Pa)	102744
											PVinjected	0.0995157		Pinlet(Pa)	14323.5											PVinjected	0.0498688		Pinlet(Pa)	102152
											PVinjected	0.100523		Pinlet(Pa)	13299.4											PVinjected	0.0504389		Pinlet(Pa)	101442
											PVinjected	0.101548		Pinlet(Pa)	11829.6											PVinjected	0.0509974		Pinlet(Pa)	100718
											PVinjected	0.102647		Pinlet(Pa)	10869											PVinjected	0.0515635		Pinlet(Pa)	100022
											PVinjected	0.103665		Pinlet(Pa)	10073.3											PVinjected	0.05209		Pinlet(Pa)	99231.5
											PVinjected	0.104706		Pinlet(Pa)	8809.76											PVinjected	0.0526276		Pinlet(Pa)	98468.6
											PVinjected	0.105696		Pinlet(Pa)	7330.4											PVinjected	0.0531809		Pinlet(Pa)	97844.7
											PVinjected	0.117142		Pinlet(Pa)	1431.33											PVinjected	0.0537634		Pinlet(Pa)	96798.6
											PVinjected	0.207192		Pinlet(Pa)	1432.11											PVinjected	0.0542648		Pinlet(Pa)	95768.2
											PVinjected	0.306765		Pinlet(Pa)	1432.35											PVinjected	0.0548207		Pinlet(Pa)	94865.9
											PVinjected	0.417466		Pinlet(Pa)	1432.32											PVinjected	0.055319		Pinlet(Pa)	93886.1
											PVinjected	0.51823		Pinlet(Pa)	1432.04											PVinjected	0.0558577		Pinlet(Pa)	92934.6
											PVinjected	0.621309		Pinlet(Pa)	1432.35											PVinjected	0.0564285		Pinlet(Pa)	91859.8
											PVinjected	0.727773		Pinlet(Pa)	1432.77											PVinjected	0.0569772		Pinlet(Pa)	90902.1
											PVinjected	0.843527		Pinlet(Pa)	1432.76											PVinjected	0.0575064		Pinlet(Pa)	90232.6
											PVinjected	0.950318		Pinlet(Pa)	1432.65											PVinjected	0.058057		Pinlet(Pa)	89271.2
											PVinjected	1.06357		Pinlet(Pa)	1432.73											PVinjected	0.0585762		Pinlet(Pa)	88378.6
											PVinjected	1.17778		Pinlet(Pa)	1431.85											PVinjected	0.059157		Pinlet(Pa)	87700.6
											PVinjected	1.28984		Pinlet(Pa)	1432.35											PVinjected	0.0596763		Pinlet(Pa)	87040
											PVinjected	1.39434		Pinlet(Pa)	1431.85											PVinjected	0.0602226		Pinlet(Pa)	86354.3
											PVinjected	1.51268		Pinlet(Pa)	1432.14											PVinjected	0.0607532		Pinlet(Pa)	85541.7
											PVinjected	1.61992		Pinlet(Pa)	1432.47											PVinjected	0.0612906		Pinlet(Pa)	84851.8
											PVinjected	1.73457		Pinlet(Pa)	1431.46											PVinjected	0.061815		Pinlet(Pa)	84116
											PVinjected	1.85522		Pinlet(Pa)	1431.52											PVinjected	0.0623542		Pinlet(Pa)	83316.5
											PVinjected	1.95776		Pinlet(Pa)	1429.86											PVinjected	0.0628764		Pinlet(Pa)	82509.8
											PVinjected	2.06253		Pinlet(Pa)	1430.32											PVinjected	0.0634735		Pinlet(Pa)	81577.9
											PVinjected	2.16785		Pinlet(Pa)	1429.31											PVinjected	0.0640169		Pinlet(Pa)	80940.4
											PVinjected	2.28146		Pinlet(Pa)	1427.7											PVinjected	0.0645758		Pinlet(Pa)	79834.9
											PVinjected	2.38144		Pinlet(Pa)	1428.8											PVinjected	0.0650996		Pinlet(Pa)	79165.4
											PVinjected	2.4903		Pinlet(Pa)	1426.93											PVinjected	0.0656178		Pinlet(Pa)	78203.2
											PVinjected	2.59912		Pinlet(Pa)	1428.12											PVinjected	0.0661757		Pinlet(Pa)	77295.1
											PVinjected	2.70279		Pinlet(Pa)	1427.47											PVinjected	0.0667352		Pinlet(Pa)	76695.6
											PVinjected	2.80386		Pinlet(Pa)	1424.94											PVinjected	0.0672199		Pinlet(Pa)	75753.1
											PVinjected	2.89188		Pinlet(Pa)	1421.47											PVinjected	0.0677606		Pinlet(Pa)	74902.3
											PVinjected	2.98139		Pinlet(Pa)	1419.92											PVinjected	0.0682739		Pinlet(Pa)	73985.6
											PVinjected	3.06968		Pinlet(Pa)	1419.65											PVinjected	0.0688364		Pinlet(Pa)	72984.4
											PVinjected	3.16893		Pinlet(Pa)	1419.31											PVinjected	0.0694055		Pinlet(Pa)	71994.1
											PVinjected	3.26719		Pinlet(Pa)	1415.95											PVinjected	0.069927		Pinlet(Pa)	70699.6
											PVinjected	3.36408		Pinlet(Pa)	1413.64											PVinjected	0.0704542		Pinlet(Pa)	69819.7
											PVinjected	3.45203		Pinlet(Pa)	1412.89											PVinjected	0.0710138		Pinlet(Pa)	68812.2
											PVinjected	3.54246		Pinlet(Pa)	1411.66											PVinjected	0.0715139		Pinlet(Pa)	67818.3
											PVinjected	3.62739		Pinlet(Pa)	1410.33											PVinjected	0.0720163		Pinlet(Pa)	66966.1
											PVinjected	3.71373		Pinlet(Pa)	1410.65											PVinjected	0.0725883		Pinlet(Pa)	65905.9
											PVinjected	3.8		Pinlet(Pa)	1408.25											PVinjected	0.0731135		Pinlet(Pa)	65186.8
											PVinjected	3.88474		Pinlet(Pa)	1408.14											PVinjected	0.0736482		Pinlet(Pa)	64018.5
											PVinjected	3.96571		Pinlet(Pa)	1406.89											PVinjected	0.0741788		Pinlet(Pa)	63202.3
											PVinjected	4.04859		Pinlet(Pa)	1406.02											PVinjected	0.0747476		Pinlet(Pa)	62207.5
											PVinjected	4.12867		Pinlet(Pa)	1406.46											PVinjected	0.0753153		Pinlet(Pa)	61229.1
											PVinjected	4.20994		Pinlet(Pa)	1404.74											PVinjected	0.0758634		Pinlet(Pa)	60466.4
											PVinjected	4.29092		Pinlet(Pa)	1403.74											PVinjected	0.0763758		Pinlet(Pa)	59584.8
											PVinjected	4.3661		Pinlet(Pa)	1404.32											PVinjected	0.0769056		Pinlet(Pa)	58532.1
											PVinjected	4.44343		Pinlet(Pa)	1406.28											PVinjected	0.0773778		Pinlet(Pa)	57776.3
											PVinjected	4.52032		Pinlet(Pa)	1403.57											PVinjected	0.077929		Pinlet(Pa)	57091.3
											PVinjected	4.59936		Pinlet(Pa)	1399.8											PVinjected	0.078428		Pinlet(Pa)	56170.7
											PVinjected	4.67088		Pinlet(Pa)	1399.94											PVinjected	0.0789625		Pinlet(Pa)	55415.1
											PVinjected	4.74424		Pinlet(Pa)	1399.46											PVinjected	0.0795022		Pinlet(Pa)	54761
											PVinjected	4.81532		Pinlet(Pa)	1394.76											PVinjected	0.0800215		Pinlet(Pa)	54034.5
											PVinjected	4.8826		Pinlet(Pa)	1391.32											PVinjected	0.0805915		Pinlet(Pa)	53262.2
											PVinjected	4.95031		Pinlet(Pa)	1390.83											PVinjected	0.0811349		Pinlet(Pa)	52320.4
											PVinjected	5.02028		Pinlet(Pa)	1386.74											PVinjected	0.0816833		Pinlet(Pa)	51302.1
											PVinjected	5.08517		Pinlet(Pa)	1386.78											PVinjected	0.0822034		Pinlet(Pa)	50693.4
											PVinjected	5.14689		Pinlet(Pa)	1383.43											PVinjected	0.0827467		Pinlet(Pa)	49717.9
											PVinjected	5.20807		Pinlet(Pa)	1380.49											PVinjected	0.0832846		Pinlet(Pa)	48996.3
																										PVinjected	0.0838513		Pinlet(Pa)	47756.7
																										PVinjected	0.0843866		Pinlet(Pa)	46935.6
																										PVinjected	0.0849289		Pinlet(Pa)	45823.5
																										PVinjected	0.0854194		Pinlet(Pa)	45044.5
																										PVinjected	0.0859797		Pinlet(Pa)	43841
																										PVinjected	0.0865071		Pinlet(Pa)	42913.2
																										PVinjected	0.0870839		Pinlet(Pa)	42171.5
																										PVinjected	0.0876666		Pinlet(Pa)	41379.5
																										PVinjected	0.088222		Pinlet(Pa)	40494.2
																										PVinjected	0.0887909		Pinlet(Pa)	39852.1
																										PVinjected	0.0893604		Pinlet(Pa)	39051.4
																										PVinjected	0.08986		Pinlet(Pa)	38221.6
																										PVinjected	0.0903628		Pinlet(Pa)	37524.5
																										PVinjected	0.0909184		Pinlet(Pa)	36871.8
																										PVinjected	0.0914159		Pinlet(Pa)	36144.5
																										PVinjected	0.09196		Pinlet(Pa)	35428.3
																										PVinjected	0.0925128		Pinlet(Pa)	34797.1
																										PVinjected	0.0930976		Pinlet(Pa)	33939.1
																										PVinjected	0.0936461		Pinlet(Pa)	33220.4
																										PVinjected	0.0942329		Pinlet(Pa)	32100.4
																										PVinjected	0.0947652		Pinlet(Pa)	31624.8
																										PVinjected	0.0952929		Pinlet(Pa)	30953.5
																										PVinjected	0.0958293		Pinlet(Pa)	30455.8
																										PVinjected	0.0963412		Pinlet(Pa)	29752.2
																										PVinjected	0.096947		Pinlet(Pa)	28667.3
																										PVinjected	0.0974853		Pinlet(Pa)	27875
																										PVinjected	0.0980683		Pinlet(Pa)	27152.7
																										PVinjected	0.0985991		Pinlet(Pa)	26835.7
																										PVinjected	0.0991714		Pinlet(Pa)	26220.2
																										PVinjected	0.0996821		Pinlet(Pa)	25677.2
																										PVinjected	0.10024		Pinlet(Pa)	25064.4
																										PVinjected	0.100775		Pinlet(Pa)	24357.6
																										PVinjected	0.101311		Pinlet(Pa)	23773.7
																										PVinjected	0.101839		Pinlet(Pa)	23182.4
																										PVinjected	0.102339		Pinlet(Pa)	22609.1
																										PVinjected	0.102837		Pinlet(Pa)	21878
																										PVinjected	0.103377		Pinlet(Pa)	21000.1
																										PVinjected	0.103928		Pinlet(Pa)	20290.7
																										PVinjected	0.104454		Pinlet(Pa)	19704.1
																										PVinjected	0.104997		Pinlet(Pa)	19115.2
																										PVinjected	0.105524		Pinlet(Pa)	18267.8
																										PVinjected	0.106035		Pinlet(Pa)	17538.7
																										PVinjected	0.106579		Pinlet(Pa)	16701
																										PVinjected	0.107092		Pinlet(Pa)	16012.4
																										PVinjected	0.107628		Pinlet(Pa)	15254.5
																										PVinjected	0.108138		Pinlet(Pa)	14272.7
																										PVinjected	0.108636		Pinlet(Pa)	13549.4
																										PVinjected	0.109193		Pinlet(Pa)	12282.7
																										PVinjected	0.109676		Pinlet(Pa)	11489.5
																										PVinjected	0.110222		Pinlet(Pa)	10830.5
																										PVinjected	0.110808		Pinlet(Pa)	9907.24
																										PVinjected	0.111306		Pinlet(Pa)	9100.26
																										PVinjected	0.111862		Pinlet(Pa)	7634.07
																										PVinjected	0.112364		Pinlet(Pa)	6944.57
																										PVinjected	0.112878		Pinlet(Pa)	5296.85
																										PVinjected	0.13831		Pinlet(Pa)	2730
																										PVinjected	0.168673		Pinlet(Pa)	2730
																										PVinjected	0.199294		Pinlet(Pa)	2730
																										PVinjected	0.230996		Pinlet(Pa)	2730
																										PVinjected	0.265099		Pinlet(Pa)	2730
																										PVinjected	0.298893		Pinlet(Pa)	2730
																										PVinjected	0.332418		Pinlet(Pa)	2730
																										PVinjected	0.365849		Pinlet(Pa)	2730
																										PVinjected	0.401033		Pinlet(Pa)	2730
																										PVinjected	0.437331		Pinlet(Pa)	2730
																										PVinjected	0.473279		Pinlet(Pa)	2730
																										PVinjected	0.506256		Pinlet(Pa)	2730
																										PVinjected	0.537931		Pinlet(Pa)	2730
																										PVinjected	0.57188		Pinlet(Pa)	2730
																										PVinjected	0.605497		Pinlet(Pa)	2730
																										PVinjected	0.639878		Pinlet(Pa)	2730
																										PVinjected	0.671509		Pinlet(Pa)	2730
																										PVinjected	0.701592		Pinlet(Pa)	2730
																										PVinjected	0.735343		Pinlet(Pa)	2730
																										PVinjected	0.769123		Pinlet(Pa)	2730
																										PVinjected	0.803892		Pinlet(Pa)	2730
																										PVinjected	0.838012		Pinlet(Pa)	2730
																										PVinjected	0.869919		Pinlet(Pa)	2730
																										PVinjected	0.903203		Pinlet(Pa)	2730
																										PVinjected	0.933386		Pinlet(Pa)	2730
																										PVinjected	0.966936		Pinlet(Pa)	2730
																										PVinjected	0.994965		Pinlet(Pa)	2730
																										PVinjected	1.02611		Pinlet(Pa)	2730
																										PVinjected	1.05465		Pinlet(Pa)	2730
																										PVinjected	1.08651		Pinlet(Pa)	2730
																										PVinjected	1.119		Pinlet(Pa)	2730
																										PVinjected	1.14991		Pinlet(Pa)	2730
																										PVinjected	1.17978		Pinlet(Pa)	2730
																										PVinjected	1.20903		Pinlet(Pa)	2730
																										PVinjected	1.23758		Pinlet(Pa)	2730
																										PVinjected	1.26666		Pinlet(Pa)	2730.61
																										PVinjected	1.2985		Pinlet(Pa)	2730.42
																										PVinjected	1.32946		Pinlet(Pa)	2729.56
																										PVinjected	1.36262		Pinlet(Pa)	2730.81
																										PVinjected	1.39234		Pinlet(Pa)	2730.78
																										PVinjected	1.42235		Pinlet(Pa)	2730.98
																										PVinjected	1.45282		Pinlet(Pa)	2730.73
																										PVinjected	1.48293		Pinlet(Pa)	2731.07
																										PVinjected	1.51373		Pinlet(Pa)	2730.75
																										PVinjected	1.54513		Pinlet(Pa)	2730.2
																										PVinjected	1.57597		Pinlet(Pa)	2731.4
																										PVinjected	1.60623		Pinlet(Pa)	2730.42
																										PVinjected	1.63531		Pinlet(Pa)	2731.16
																										PVinjected	1.66881		Pinlet(Pa)	2730.59
																										PVinjected	1.70074		Pinlet(Pa)	2731.55
																										PVinjected	1.7322		Pinlet(Pa)	2730.36
																										PVinjected	1.76391		Pinlet(Pa)	2731.32
																										PVinjected	1.79695		Pinlet(Pa)	2730.44
																										PVinjected	1.82855		Pinlet(Pa)	2730.65
																										PVinjected	1.85796		Pinlet(Pa)	2729.7
																										PVinjected	1.89		Pinlet(Pa)	2730.29
																										PVinjected	1.92315		Pinlet(Pa)	2730.83
																										PVinjected	1.95289		Pinlet(Pa)	2731
																										PVinjected	1.98393		Pinlet(Pa)	2731.18
																										PVinjected	2.0141		Pinlet(Pa)	2730.47
																										PVinjected	2.04333		Pinlet(Pa)	2730.44
																										PVinjected	2.07243		Pinlet(Pa)	2730.16

## Sheet: Dataset C
		Theta=170																											Theta=100
		PVinjected	0.000693663		Pinlet(Pa)	162635																							PVinjected	0.00069548		Pinlet(Pa)	160292
		PVinjected	0.00127722		Pinlet(Pa)	162520													0	554									PVinjected	0.00128713		Pinlet(Pa)	159977
		PVinjected	0.00184028		Pinlet(Pa)	162225													2	554									PVinjected	0.00184846		Pinlet(Pa)	159549
		PVinjected	0.00234122		Pinlet(Pa)	162163																							PVinjected	0.00244854		Pinlet(Pa)	159089
		PVinjected	0.00292345		Pinlet(Pa)	161732																							PVinjected	0.00300636		Pinlet(Pa)	158775
		PVinjected	0.00344105		Pinlet(Pa)	161199													0	3145									PVinjected	0.00358838		Pinlet(Pa)	158430
		PVinjected	0.00399496		Pinlet(Pa)	160635													2	3145									PVinjected	0.00412842		Pinlet(Pa)	157965
		PVinjected	0.00447117		Pinlet(Pa)	160303																							PVinjected	0.00466751		Pinlet(Pa)	157419
		PVinjected	0.00502068		Pinlet(Pa)	159864																							PVinjected	0.0051874		Pinlet(Pa)	156983
		PVinjected	0.00555746		Pinlet(Pa)	158900																							PVinjected	0.00573519		Pinlet(Pa)	156192
		PVinjected	0.0060874		Pinlet(Pa)	158528																							PVinjected	0.00631257		Pinlet(Pa)	155657
		PVinjected	0.00659947		Pinlet(Pa)	157904																							PVinjected	0.00687315		Pinlet(Pa)	155161
		PVinjected	0.00714967		Pinlet(Pa)	157276																							PVinjected	0.00740794		Pinlet(Pa)	154580
		PVinjected	0.00768726		Pinlet(Pa)	156856																							PVinjected	0.00793971		Pinlet(Pa)	154113
		PVinjected	0.00818252		Pinlet(Pa)	156660																							PVinjected	0.0085509		Pinlet(Pa)	153562
		PVinjected	0.00871069		Pinlet(Pa)	156107																							PVinjected	0.00907997		Pinlet(Pa)	152918
		PVinjected	0.00917032		Pinlet(Pa)	155139																							PVinjected	0.00966042		Pinlet(Pa)	152450
		PVinjected	0.00966777		Pinlet(Pa)	154832																							PVinjected	0.0101666		Pinlet(Pa)	151873
		PVinjected	0.0102221		Pinlet(Pa)	153905																							PVinjected	0.0107302		Pinlet(Pa)	151392
		PVinjected	0.0107389		Pinlet(Pa)	153152																							PVinjected	0.0113005		Pinlet(Pa)	150834
		PVinjected	0.0112964		Pinlet(Pa)	152357																							PVinjected	0.0118363		Pinlet(Pa)	150396
		PVinjected	0.0118385		Pinlet(Pa)	151263																							PVinjected	0.012396		Pinlet(Pa)	149832
		PVinjected	0.0123315		Pinlet(Pa)	150014																							PVinjected	0.0129302		Pinlet(Pa)	149266
		PVinjected	0.0128747		Pinlet(Pa)	149091																							PVinjected	0.0134773		Pinlet(Pa)	148802
		PVinjected	0.013365		Pinlet(Pa)	148618																							PVinjected	0.0140143		Pinlet(Pa)	148194
		PVinjected	0.0138717		Pinlet(Pa)	147839																							PVinjected	0.0145637		Pinlet(Pa)	147610
		PVinjected	0.014373		Pinlet(Pa)	146735																							PVinjected	0.015124		Pinlet(Pa)	146933
		PVinjected	0.0148929		Pinlet(Pa)	145832																							PVinjected	0.0156191		Pinlet(Pa)	146212
		PVinjected	0.0153877		Pinlet(Pa)	144988																							PVinjected	0.0161718		Pinlet(Pa)	145549
		PVinjected	0.0158798		Pinlet(Pa)	144022																							PVinjected	0.0167044		Pinlet(Pa)	144953
		PVinjected	0.0164013		Pinlet(Pa)	143362																							PVinjected	0.0172725		Pinlet(Pa)	144438
		PVinjected	0.0169025		Pinlet(Pa)	142678																							PVinjected	0.0178442		Pinlet(Pa)	143629
		PVinjected	0.0174531		Pinlet(Pa)	141663																							PVinjected	0.0183822		Pinlet(Pa)	143029
		PVinjected	0.0179882		Pinlet(Pa)	140729																							PVinjected	0.0189022		Pinlet(Pa)	142169
		PVinjected	0.0184968		Pinlet(Pa)	139861																							PVinjected	0.0194192		Pinlet(Pa)	141179
		PVinjected	0.0190094		Pinlet(Pa)	139244																							PVinjected	0.019949		Pinlet(Pa)	140373
		PVinjected	0.0195447		Pinlet(Pa)	138423																							PVinjected	0.0205289		Pinlet(Pa)	139233
		PVinjected	0.0200735		Pinlet(Pa)	137606																							PVinjected	0.021108		Pinlet(Pa)	138534
		PVinjected	0.0205962		Pinlet(Pa)	137176																							PVinjected	0.0216141		Pinlet(Pa)	137602
		PVinjected	0.0211074		Pinlet(Pa)	136020																							PVinjected	0.0221766		Pinlet(Pa)	136591
		PVinjected	0.021646		Pinlet(Pa)	134946																							PVinjected	0.0226952		Pinlet(Pa)	135883
		PVinjected	0.022174		Pinlet(Pa)	134285																							PVinjected	0.0232316		Pinlet(Pa)	135193
		PVinjected	0.022694		Pinlet(Pa)	133376																							PVinjected	0.023751		Pinlet(Pa)	134561
		PVinjected	0.0231929		Pinlet(Pa)	132113																							PVinjected	0.0242951		Pinlet(Pa)	133787
		PVinjected	0.0236982		Pinlet(Pa)	131708																							PVinjected	0.0248085		Pinlet(Pa)	132929
		PVinjected	0.0241837		Pinlet(Pa)	130898																							PVinjected	0.0253173		Pinlet(Pa)	132245
		PVinjected	0.0246821		Pinlet(Pa)	130011																							PVinjected	0.0258319		Pinlet(Pa)	131470
		PVinjected	0.0251768		Pinlet(Pa)	129151																							PVinjected	0.0263932		Pinlet(Pa)	130779
		PVinjected	0.0257266		Pinlet(Pa)	128336																							PVinjected	0.0268859		Pinlet(Pa)	129939
		PVinjected	0.0262162		Pinlet(Pa)	127690																							PVinjected	0.0274229		Pinlet(Pa)	129213
		PVinjected	0.0267676		Pinlet(Pa)	127219																							PVinjected	0.0279657		Pinlet(Pa)	128713
		PVinjected	0.0273036		Pinlet(Pa)	126343																							PVinjected	0.0285107		Pinlet(Pa)	128011
		PVinjected	0.0278069		Pinlet(Pa)	125631																							PVinjected	0.0290093		Pinlet(Pa)	127381
		PVinjected	0.0282914		Pinlet(Pa)	125198																							PVinjected	0.029541		Pinlet(Pa)	126666
		PVinjected	0.0287837		Pinlet(Pa)	124370																							PVinjected	0.0300853		Pinlet(Pa)	126137
		PVinjected	0.0292835		Pinlet(Pa)	123493																							PVinjected	0.0305968		Pinlet(Pa)	125355
		PVinjected	0.0298206		Pinlet(Pa)	122776																							PVinjected	0.0311105		Pinlet(Pa)	124508
		PVinjected	0.0303331		Pinlet(Pa)	121991																							PVinjected	0.0316504		Pinlet(Pa)	123890
		PVinjected	0.0308436		Pinlet(Pa)	121533																							PVinjected	0.0321698		Pinlet(Pa)	123175
		PVinjected	0.0313337		Pinlet(Pa)	121083																							PVinjected	0.0327076		Pinlet(Pa)	122196
		PVinjected	0.0318579		Pinlet(Pa)	119710																							PVinjected	0.0332201		Pinlet(Pa)	121413
		PVinjected	0.0324021		Pinlet(Pa)	119155																							PVinjected	0.0337865		Pinlet(Pa)	120878
		PVinjected	0.0329303		Pinlet(Pa)	118461																							PVinjected	0.0343343		Pinlet(Pa)	120387
		PVinjected	0.0334612		Pinlet(Pa)	117441																							PVinjected	0.0348662		Pinlet(Pa)	119582
		PVinjected	0.0339455		Pinlet(Pa)	116855																							PVinjected	0.0354201		Pinlet(Pa)	118838
		PVinjected	0.0344413		Pinlet(Pa)	115766																							PVinjected	0.0359391		Pinlet(Pa)	118259
		PVinjected	0.0349641		Pinlet(Pa)	114904																							PVinjected	0.0365213		Pinlet(Pa)	117518
		PVinjected	0.035437		Pinlet(Pa)	114093																							PVinjected	0.037073		Pinlet(Pa)	116883
		PVinjected	0.0359893		Pinlet(Pa)	113051																							PVinjected	0.0376073		Pinlet(Pa)	116345
		PVinjected	0.0365465		Pinlet(Pa)	112400																							PVinjected	0.0381168		Pinlet(Pa)	115812
		PVinjected	0.0370806		Pinlet(Pa)	111719																							PVinjected	0.0386182		Pinlet(Pa)	115249
		PVinjected	0.0376194		Pinlet(Pa)	110874																							PVinjected	0.0391395		Pinlet(Pa)	114743
		PVinjected	0.0381126		Pinlet(Pa)	109826																							PVinjected	0.0396709		Pinlet(Pa)	114161
		PVinjected	0.038665		Pinlet(Pa)	108692																							PVinjected	0.0401887		Pinlet(Pa)	113716
		PVinjected	0.039213		Pinlet(Pa)	107535																							PVinjected	0.0407219		Pinlet(Pa)	113067
		PVinjected	0.039747		Pinlet(Pa)	106823																							PVinjected	0.0412695		Pinlet(Pa)	112549
		PVinjected	0.0402564		Pinlet(Pa)	105474																							PVinjected	0.0417991		Pinlet(Pa)	111614
		PVinjected	0.0407553		Pinlet(Pa)	104574																							PVinjected	0.0423262		Pinlet(Pa)	111046
		PVinjected	0.041295		Pinlet(Pa)	103154																							PVinjected	0.0428431		Pinlet(Pa)	110169
		PVinjected	0.0418612		Pinlet(Pa)	102423																							PVinjected	0.0434004		Pinlet(Pa)	109495
		PVinjected	0.0424226		Pinlet(Pa)	101239																							PVinjected	0.0439041		Pinlet(Pa)	108944
		PVinjected	0.0429115		Pinlet(Pa)	100435																							PVinjected	0.0444654		Pinlet(Pa)	108480
		PVinjected	0.0434561		Pinlet(Pa)	99888.1																							PVinjected	0.0449972		Pinlet(Pa)	107953
		PVinjected	0.0440088		Pinlet(Pa)	98930.3																							PVinjected	0.0455634		Pinlet(Pa)	107275
		PVinjected	0.0445209		Pinlet(Pa)	98736.7																							PVinjected	0.0461287		Pinlet(Pa)	106531
		PVinjected	0.0450619		Pinlet(Pa)	97803.6																							PVinjected	0.0466001		Pinlet(Pa)	105997
		PVinjected	0.0455948		Pinlet(Pa)	96875.3																							PVinjected	0.0471635		Pinlet(Pa)	105462
		PVinjected	0.0461235		Pinlet(Pa)	96433.4																							PVinjected	0.0477235		Pinlet(Pa)	104657
		PVinjected	0.0466422		Pinlet(Pa)	95840.1																							PVinjected	0.0482846		Pinlet(Pa)	104024
		PVinjected	0.0471363		Pinlet(Pa)	95127.6																							PVinjected	0.04879		Pinlet(Pa)	103375
		PVinjected	0.0476545		Pinlet(Pa)	94640.3																							PVinjected	0.0493391		Pinlet(Pa)	102744
		PVinjected	0.0481603		Pinlet(Pa)	93632.3																							PVinjected	0.0498688		Pinlet(Pa)	102152
		PVinjected	0.048638		Pinlet(Pa)	92998																							PVinjected	0.0504389		Pinlet(Pa)	101442
		PVinjected	0.0491435		Pinlet(Pa)	92203.5																							PVinjected	0.0509974		Pinlet(Pa)	100718
		PVinjected	0.0496534		Pinlet(Pa)	91259.2																							PVinjected	0.0515635		Pinlet(Pa)	100022
		PVinjected	0.050166		Pinlet(Pa)	90794.2																							PVinjected	0.05209		Pinlet(Pa)	99231.5
		PVinjected	0.0506834		Pinlet(Pa)	89957.8																							PVinjected	0.0526276		Pinlet(Pa)	98468.6
		PVinjected	0.0511941		Pinlet(Pa)	89142.1																							PVinjected	0.0531809		Pinlet(Pa)	97844.7
		PVinjected	0.0517464		Pinlet(Pa)	88406.8																							PVinjected	0.0537634		Pinlet(Pa)	96798.6
		PVinjected	0.0522682		Pinlet(Pa)	87560.1																							PVinjected	0.0542648		Pinlet(Pa)	95768.2
		PVinjected	0.052778		Pinlet(Pa)	86618.5																							PVinjected	0.0548207		Pinlet(Pa)	94865.9
		PVinjected	0.0532856		Pinlet(Pa)	86020.2																							PVinjected	0.055319		Pinlet(Pa)	93886.1
		PVinjected	0.0538571		Pinlet(Pa)	85168.4																							PVinjected	0.0558577		Pinlet(Pa)	92934.6
		PVinjected	0.0543638		Pinlet(Pa)	84562.3																							PVinjected	0.0564285		Pinlet(Pa)	91859.8
		PVinjected	0.0548931		Pinlet(Pa)	84252.6																							PVinjected	0.0569772		Pinlet(Pa)	90902.1
		PVinjected	0.0553847		Pinlet(Pa)	83615.7																							PVinjected	0.0575064		Pinlet(Pa)	90232.6
		PVinjected	0.0558972		Pinlet(Pa)	83135.2																							PVinjected	0.058057		Pinlet(Pa)	89271.2
		PVinjected	0.0564286		Pinlet(Pa)	82572.6																							PVinjected	0.0585762		Pinlet(Pa)	88378.6
		PVinjected	0.0569388		Pinlet(Pa)	81602.2																							PVinjected	0.059157		Pinlet(Pa)	87700.6
		PVinjected	0.0575004		Pinlet(Pa)	80280.5																							PVinjected	0.0596763		Pinlet(Pa)	87040
		PVinjected	0.058022		Pinlet(Pa)	79346.8																							PVinjected	0.0602226		Pinlet(Pa)	86354.3
		PVinjected	0.0585115		Pinlet(Pa)	78041.6																							PVinjected	0.0607532		Pinlet(Pa)	85541.7
		PVinjected	0.0590479		Pinlet(Pa)	77350.9																							PVinjected	0.0612906		Pinlet(Pa)	84851.8
		PVinjected	0.0595639		Pinlet(Pa)	76569.5																							PVinjected	0.061815		Pinlet(Pa)	84116
		PVinjected	0.0601115		Pinlet(Pa)	75806																							PVinjected	0.0623542		Pinlet(Pa)	83316.5
		PVinjected	0.0606042		Pinlet(Pa)	75305																							PVinjected	0.0628764		Pinlet(Pa)	82509.8
		PVinjected	0.0611276		Pinlet(Pa)	74165																							PVinjected	0.0634735		Pinlet(Pa)	81577.9
		PVinjected	0.0616637		Pinlet(Pa)	73790																							PVinjected	0.0640169		Pinlet(Pa)	80940.4
		PVinjected	0.0621865		Pinlet(Pa)	72706.9																							PVinjected	0.0645758		Pinlet(Pa)	79834.9
		PVinjected	0.0627494		Pinlet(Pa)	72055.1																							PVinjected	0.0650996		Pinlet(Pa)	79165.4
		PVinjected	0.0632322		Pinlet(Pa)	71262.9																							PVinjected	0.0656178		Pinlet(Pa)	78203.2
		PVinjected	0.0637991		Pinlet(Pa)	70395.8																							PVinjected	0.0661757		Pinlet(Pa)	77295.1
		PVinjected	0.0643348		Pinlet(Pa)	69525.6																							PVinjected	0.0667352		Pinlet(Pa)	76695.6
		PVinjected	0.0648707		Pinlet(Pa)	68251.5																							PVinjected	0.0672199		Pinlet(Pa)	75753.1
		PVinjected	0.0654035		Pinlet(Pa)	67571.9																							PVinjected	0.0677606		Pinlet(Pa)	74902.3
		PVinjected	0.0659262		Pinlet(Pa)	66326.2																							PVinjected	0.0682739		Pinlet(Pa)	73985.6
		PVinjected	0.0664425		Pinlet(Pa)	65455.6																							PVinjected	0.0688364		Pinlet(Pa)	72984.4
		PVinjected	0.0669799		Pinlet(Pa)	64601.3																							PVinjected	0.0694055		Pinlet(Pa)	71994.1
		PVinjected	0.0675117		Pinlet(Pa)	64154.9																							PVinjected	0.069927		Pinlet(Pa)	70699.6
		PVinjected	0.068065		Pinlet(Pa)	63234																							PVinjected	0.0704542		Pinlet(Pa)	69819.7
		PVinjected	0.06856		Pinlet(Pa)	62850.4																							PVinjected	0.0710138		Pinlet(Pa)	68812.2
		PVinjected	0.0690642		Pinlet(Pa)	62030.8																							PVinjected	0.0715139		Pinlet(Pa)	67818.3
		PVinjected	0.0696254		Pinlet(Pa)	61520.5																							PVinjected	0.0720163		Pinlet(Pa)	66966.1
		PVinjected	0.0701298		Pinlet(Pa)	60447.4																							PVinjected	0.0725883		Pinlet(Pa)	65905.9
		PVinjected	0.0706924		Pinlet(Pa)	59652.5																							PVinjected	0.0731135		Pinlet(Pa)	65186.8
		PVinjected	0.0711962		Pinlet(Pa)	59011.9																							PVinjected	0.0736482		Pinlet(Pa)	64018.5
		PVinjected	0.071704		Pinlet(Pa)	58145.3																							PVinjected	0.0741788		Pinlet(Pa)	63202.3
		PVinjected	0.0721984		Pinlet(Pa)	57460.1																							PVinjected	0.0747476		Pinlet(Pa)	62207.5
		PVinjected	0.0727319		Pinlet(Pa)	56956.9																							PVinjected	0.0753153		Pinlet(Pa)	61229.1
		PVinjected	0.0732726		Pinlet(Pa)	56363.7																							PVinjected	0.0758634		Pinlet(Pa)	60466.4
		PVinjected	0.0738197		Pinlet(Pa)	55769.3																							PVinjected	0.0763758		Pinlet(Pa)	59584.8
		PVinjected	0.0743499		Pinlet(Pa)	54614.8																							PVinjected	0.0769056		Pinlet(Pa)	58532.1
		PVinjected	0.0748915		Pinlet(Pa)	54001.7																							PVinjected	0.0773778		Pinlet(Pa)	57776.3
		PVinjected	0.0753509		Pinlet(Pa)	53493.9																							PVinjected	0.077929		Pinlet(Pa)	57091.3
		PVinjected	0.0758503		Pinlet(Pa)	52830.5																							PVinjected	0.078428		Pinlet(Pa)	56170.7
		PVinjected	0.0763812		Pinlet(Pa)	51817.6																							PVinjected	0.0789625		Pinlet(Pa)	55415.1
		PVinjected	0.0769252		Pinlet(Pa)	50903																							PVinjected	0.0795022		Pinlet(Pa)	54761
		PVinjected	0.0774174		Pinlet(Pa)	50524.5																							PVinjected	0.0800215		Pinlet(Pa)	54034.5
		PVinjected	0.0779444		Pinlet(Pa)	49578.3																							PVinjected	0.0805915		Pinlet(Pa)	53262.2
		PVinjected	0.0784582		Pinlet(Pa)	48721.7																							PVinjected	0.0811349		Pinlet(Pa)	52320.4
		PVinjected	0.078996		Pinlet(Pa)	48365																							PVinjected	0.0816833		Pinlet(Pa)	51302.1
		PVinjected	0.0795192		Pinlet(Pa)	46987.8																							PVinjected	0.0822034		Pinlet(Pa)	50693.4
		PVinjected	0.0800317		Pinlet(Pa)	46171.3																							PVinjected	0.0827467		Pinlet(Pa)	49717.9
		PVinjected	0.0805558		Pinlet(Pa)	45623.7																							PVinjected	0.0832846		Pinlet(Pa)	48996.3
		PVinjected	0.0810605		Pinlet(Pa)	45156																							PVinjected	0.0838513		Pinlet(Pa)	47756.7
		PVinjected	0.0815537		Pinlet(Pa)	44518.8																							PVinjected	0.0843866		Pinlet(Pa)	46935.6
		PVinjected	0.0820695		Pinlet(Pa)	43380																							PVinjected	0.0849289		Pinlet(Pa)	45823.5
		PVinjected	0.0826136		Pinlet(Pa)	42389.9																							PVinjected	0.0854194		Pinlet(Pa)	45044.5
		PVinjected	0.0831351		Pinlet(Pa)	41854.2																							PVinjected	0.0859797		Pinlet(Pa)	43841
		PVinjected	0.0836774		Pinlet(Pa)	40588.9																							PVinjected	0.0865071		Pinlet(Pa)	42913.2
		PVinjected	0.0842079		Pinlet(Pa)	39216.1																							PVinjected	0.0870839		Pinlet(Pa)	42171.5
		PVinjected	0.0847654		Pinlet(Pa)	38451.6																							PVinjected	0.0876666		Pinlet(Pa)	41379.5
		PVinjected	0.0853146		Pinlet(Pa)	38451.6																							PVinjected	0.088222		Pinlet(Pa)	40494.2
		PVinjected	0.0858585		Pinlet(Pa)	33785																							PVinjected	0.0887909		Pinlet(Pa)	39852.1
		PVinjected	0.0863935		Pinlet(Pa)	33785																							PVinjected	0.0893604		Pinlet(Pa)	39051.4
		PVinjected	0.0869473		Pinlet(Pa)	33785																							PVinjected	0.08986		Pinlet(Pa)	38221.6
		PVinjected	0.0875133		Pinlet(Pa)	33785																							PVinjected	0.0903628		Pinlet(Pa)	37524.5
		PVinjected	0.0880874		Pinlet(Pa)	33785																							PVinjected	0.0909184		Pinlet(Pa)	36871.8
		PVinjected	0.0886182		Pinlet(Pa)	33785																							PVinjected	0.0914159		Pinlet(Pa)	36144.5
		PVinjected	0.0891579		Pinlet(Pa)	29701.8																							PVinjected	0.09196		Pinlet(Pa)	35428.3
		PVinjected	0.0896655		Pinlet(Pa)	29701.8																							PVinjected	0.0925128		Pinlet(Pa)	34797.1
		PVinjected	0.0902107		Pinlet(Pa)	29701.8																							PVinjected	0.0930976		Pinlet(Pa)	33939.1
		PVinjected	0.0907292		Pinlet(Pa)	29701.8																							PVinjected	0.0936461		Pinlet(Pa)	33220.4
		PVinjected	0.0912464		Pinlet(Pa)	26128.9																							PVinjected	0.0942329		Pinlet(Pa)	32100.4
		PVinjected	0.0917616		Pinlet(Pa)	26128.9																							PVinjected	0.0947652		Pinlet(Pa)	31624.8
		PVinjected	0.092281		Pinlet(Pa)	26128.9																							PVinjected	0.0952929		Pinlet(Pa)	30953.5
		PVinjected	0.0927871		Pinlet(Pa)	26128.9																							PVinjected	0.0958293		Pinlet(Pa)	30455.8
		PVinjected	0.0933999		Pinlet(Pa)	26128.9																							PVinjected	0.0963412		Pinlet(Pa)	29752.2
		PVinjected	0.0939102		Pinlet(Pa)	23002.7																							PVinjected	0.096947		Pinlet(Pa)	28667.3
		PVinjected	0.0944593		Pinlet(Pa)	23002.7																							PVinjected	0.0974853		Pinlet(Pa)	27875
		PVinjected	0.0949457		Pinlet(Pa)	23002.7																							PVinjected	0.0980683		Pinlet(Pa)	27152.7
		PVinjected	0.0954393		Pinlet(Pa)	23002.7																							PVinjected	0.0985991		Pinlet(Pa)	26835.7
		PVinjected	0.0959497		Pinlet(Pa)	20267.2																							PVinjected	0.0991714		Pinlet(Pa)	26220.2
		PVinjected	0.0964489		Pinlet(Pa)	20267.2																							PVinjected	0.0996821		Pinlet(Pa)	25677.2
		PVinjected	0.0970079		Pinlet(Pa)	20267.2																							PVinjected	0.10024		Pinlet(Pa)	25064.4
		PVinjected	0.0975362		Pinlet(Pa)	20267.2																							PVinjected	0.100775		Pinlet(Pa)	24357.6
		PVinjected	0.0980568		Pinlet(Pa)	17873.7																							PVinjected	0.101311		Pinlet(Pa)	23773.7
		PVinjected	0.098557		Pinlet(Pa)	17873.7																							PVinjected	0.101839		Pinlet(Pa)	23182.4
		PVinjected	0.0990712		Pinlet(Pa)	15779.4																							PVinjected	0.102339		Pinlet(Pa)	22609.1
		PVinjected	0.0995716		Pinlet(Pa)	15779.4																							PVinjected	0.102837		Pinlet(Pa)	21878
		PVinjected	0.100117		Pinlet(Pa)	15779.4																							PVinjected	0.103377		Pinlet(Pa)	21000.1
		PVinjected	0.100592		Pinlet(Pa)	13946.8																							PVinjected	0.103928		Pinlet(Pa)	20290.7
		PVinjected	0.101123		Pinlet(Pa)	13946.8																							PVinjected	0.104454		Pinlet(Pa)	19704.1
		PVinjected	0.10164		Pinlet(Pa)	12046.4																							PVinjected	0.104997		Pinlet(Pa)	19115.2
		PVinjected	0.102163		Pinlet(Pa)	11532.1																							PVinjected	0.105524		Pinlet(Pa)	18267.8
		PVinjected	0.102679		Pinlet(Pa)	9319.65																							PVinjected	0.106035		Pinlet(Pa)	17538.7
		PVinjected	0.2			2116																							PVinjected	0.106579		Pinlet(Pa)	16701
		PVinjected	0.5			2116																							PVinjected	0.107092		Pinlet(Pa)	16012.4
			1			2116																							PVinjected	0.107628		Pinlet(Pa)	15254.5
			2			2116																							PVinjected	0.108138		Pinlet(Pa)	14272.7
																													PVinjected	0.108636		Pinlet(Pa)	13549.4
																													PVinjected	0.109193		Pinlet(Pa)	12282.7
																													PVinjected	0.109676		Pinlet(Pa)	11489.5
																													PVinjected	0.110222		Pinlet(Pa)	10830.5
																													PVinjected	0.110808		Pinlet(Pa)	9907.24
																													PVinjected	0.111306		Pinlet(Pa)	9100.26
																													PVinjected	0.111862		Pinlet(Pa)	7634.07
																													PVinjected	0.112364		Pinlet(Pa)	6944.57
																													PVinjected	0.112878		Pinlet(Pa)	5296.85
																													PVinjected	0.13831		Pinlet(Pa)	2730
																													PVinjected	0.168673		Pinlet(Pa)	2730
																													PVinjected	0.199294		Pinlet(Pa)	2730
																													PVinjected	0.230996		Pinlet(Pa)	2730
																													PVinjected	0.265099		Pinlet(Pa)	2730
																													PVinjected	0.298893		Pinlet(Pa)	2730
																													PVinjected	0.332418		Pinlet(Pa)	2730
																													PVinjected	0.365849		Pinlet(Pa)	2730
																													PVinjected	0.401033		Pinlet(Pa)	2730
																													PVinjected	0.437331		Pinlet(Pa)	2730
																													PVinjected	0.473279		Pinlet(Pa)	2730
																													PVinjected	0.506256		Pinlet(Pa)	2730
																													PVinjected	0.537931		Pinlet(Pa)	2730
																													PVinjected	0.57188		Pinlet(Pa)	2730
																													PVinjected	0.605497		Pinlet(Pa)	2730
																													PVinjected	0.639878		Pinlet(Pa)	2730
																													PVinjected	0.671509		Pinlet(Pa)	2730
																													PVinjected	0.701592		Pinlet(Pa)	2730
																													PVinjected	0.735343		Pinlet(Pa)	2730
																													PVinjected	0.769123		Pinlet(Pa)	2730
																													PVinjected	0.803892		Pinlet(Pa)	2730
																													PVinjected	0.838012		Pinlet(Pa)	2730
																													PVinjected	0.869919		Pinlet(Pa)	2730
																													PVinjected	0.903203		Pinlet(Pa)	2730
																													PVinjected	0.933386		Pinlet(Pa)	2730
																													PVinjected	0.966936		Pinlet(Pa)	2730
																													PVinjected	0.994965		Pinlet(Pa)	2730
																													PVinjected	1.02611		Pinlet(Pa)	2730
																													PVinjected	1.05465		Pinlet(Pa)	2730
																													PVinjected	1.08651		Pinlet(Pa)	2730
																													PVinjected	1.119		Pinlet(Pa)	2730
																													PVinjected	1.14991		Pinlet(Pa)	2730
																													PVinjected	1.17978		Pinlet(Pa)	2730
																													PVinjected	1.20903		Pinlet(Pa)	2730
																													PVinjected	1.23758		Pinlet(Pa)	2730
																													PVinjected	1.26666		Pinlet(Pa)	2730.61
																													PVinjected	1.2985		Pinlet(Pa)	2730.42
																													PVinjected	1.32946		Pinlet(Pa)	2729.56
																													PVinjected	1.36262		Pinlet(Pa)	2730.81
																													PVinjected	1.39234		Pinlet(Pa)	2730.78
																													PVinjected	1.42235		Pinlet(Pa)	2730.98
																													PVinjected	1.45282		Pinlet(Pa)	2730.73
																													PVinjected	1.48293		Pinlet(Pa)	2731.07
																													PVinjected	1.51373		Pinlet(Pa)	2730.75
																													PVinjected	1.54513		Pinlet(Pa)	2730.2
																													PVinjected	1.57597		Pinlet(Pa)	2731.4
																													PVinjected	1.60623		Pinlet(Pa)	2730.42
																													PVinjected	1.63531		Pinlet(Pa)	2731.16
																													PVinjected	1.66881		Pinlet(Pa)	2730.59
																													PVinjected	1.70074		Pinlet(Pa)	2731.55
																													PVinjected	1.7322		Pinlet(Pa)	2730.36
																													PVinjected	1.76391		Pinlet(Pa)	2731.32
																													PVinjected	1.79695		Pinlet(Pa)	2730.44
																													PVinjected	1.82855		Pinlet(Pa)	2730.65
																													PVinjected	1.85796		Pinlet(Pa)	2729.7
																													PVinjected	1.89		Pinlet(Pa)	2730.29
																													PVinjected	1.92315		Pinlet(Pa)	2730.83
																													PVinjected	1.95289		Pinlet(Pa)	2731
																													PVinjected	1.98393		Pinlet(Pa)	2731.18
																													PVinjected	2.0141		Pinlet(Pa)	2730.47
																													PVinjected	2.04333		Pinlet(Pa)	2730.44
																													PVinjected	2.07243		Pinlet(Pa)	2730.16

## Sheet: Dataset D
				Q=0.05 cc/hr												Q=0.005 cc/hr
				PVinjected	0.000693558		Pinlet(Pa)	1601480
				PVinjected	0.00124511		Pinlet(Pa)	1598310								PVinjected	0.00069548		Pinlet(Pa)	160292
				PVinjected	0.00181868		Pinlet(Pa)	1593280								PVinjected	0.00128713		Pinlet(Pa)	159977
				PVinjected	0.00236771		Pinlet(Pa)	1589280								PVinjected	0.00184846		Pinlet(Pa)	159549
				PVinjected	0.00290102		Pinlet(Pa)	1585250								PVinjected	0.00244854		Pinlet(Pa)	159089
				PVinjected	0.00348634		Pinlet(Pa)	1582160								PVinjected	0.00300636		Pinlet(Pa)	158775
				PVinjected	0.00404537		Pinlet(Pa)	1578810								PVinjected	0.00358838		Pinlet(Pa)	158430
				PVinjected	0.00464352		Pinlet(Pa)	1573250								PVinjected	0.00412842		Pinlet(Pa)	157965
				PVinjected	0.00521319		Pinlet(Pa)	1568820								PVinjected	0.00466751		Pinlet(Pa)	157419
				PVinjected	0.00572147		Pinlet(Pa)	1563640								PVinjected	0.0051874		Pinlet(Pa)	156983
				PVinjected	0.0062398		Pinlet(Pa)	1557770								PVinjected	0.00573519		Pinlet(Pa)	156192
				PVinjected	0.00680515		Pinlet(Pa)	1552450								PVinjected	0.00631257		Pinlet(Pa)	155657
				PVinjected	0.00733623		Pinlet(Pa)	1546180								PVinjected	0.00687315		Pinlet(Pa)	155161
				PVinjected	0.00792072		Pinlet(Pa)	1541590								PVinjected	0.00740794		Pinlet(Pa)	154580
				PVinjected	0.00849629		Pinlet(Pa)	1535970								PVinjected	0.00793971		Pinlet(Pa)	154113
				PVinjected	0.00905709		Pinlet(Pa)	1530020								PVinjected	0.0085509		Pinlet(Pa)	153562
				PVinjected	0.00961745		Pinlet(Pa)	1525010								PVinjected	0.00907997		Pinlet(Pa)	152918
				PVinjected	0.0101913		Pinlet(Pa)	1520730								PVinjected	0.00966042		Pinlet(Pa)	152450
				PVinjected	0.0107218		Pinlet(Pa)	1515610								PVinjected	0.0101666		Pinlet(Pa)	151873
				PVinjected	0.011315		Pinlet(Pa)	1510690								PVinjected	0.0107302		Pinlet(Pa)	151392
				PVinjected	0.0118747		Pinlet(Pa)	1505930								PVinjected	0.0113005		Pinlet(Pa)	150834
				PVinjected	0.0124015		Pinlet(Pa)	1500060								PVinjected	0.0118363		Pinlet(Pa)	150396
				PVinjected	0.0129821		Pinlet(Pa)	1493810								PVinjected	0.012396		Pinlet(Pa)	149832
				PVinjected	0.0135293		Pinlet(Pa)	1488020								PVinjected	0.0129302		Pinlet(Pa)	149266
				PVinjected	0.014072		Pinlet(Pa)	1482040								PVinjected	0.0134773		Pinlet(Pa)	148802
				PVinjected	0.0145732		Pinlet(Pa)	1475350								PVinjected	0.0140143		Pinlet(Pa)	148194
				PVinjected	0.0151203		Pinlet(Pa)	1468080								PVinjected	0.0145637		Pinlet(Pa)	147610
				PVinjected	0.0156621		Pinlet(Pa)	1459050								PVinjected	0.015124		Pinlet(Pa)	146933
				PVinjected	0.0162003		Pinlet(Pa)	1453110								PVinjected	0.0156191		Pinlet(Pa)	146212
				PVinjected	0.0167347		Pinlet(Pa)	1445180								PVinjected	0.0161718		Pinlet(Pa)	145549
				PVinjected	0.0172869		Pinlet(Pa)	1437980								PVinjected	0.0167044		Pinlet(Pa)	144953
				PVinjected	0.0178187		Pinlet(Pa)	1430720								PVinjected	0.0172725		Pinlet(Pa)	144438
				PVinjected	0.0183965		Pinlet(Pa)	1420400								PVinjected	0.0178442		Pinlet(Pa)	143629
				PVinjected	0.0189049		Pinlet(Pa)	1410260								PVinjected	0.0183822		Pinlet(Pa)	143029
				PVinjected	0.0193869		Pinlet(Pa)	1400320								PVinjected	0.0189022		Pinlet(Pa)	142169
				PVinjected	0.0199376		Pinlet(Pa)	1393070								PVinjected	0.0194192		Pinlet(Pa)	141179
				PVinjected	0.0204762		Pinlet(Pa)	1382790								PVinjected	0.019949		Pinlet(Pa)	140373
				PVinjected	0.0210093		Pinlet(Pa)	1373660								PVinjected	0.0205289		Pinlet(Pa)	139233
				PVinjected	0.0215483		Pinlet(Pa)	1363540								PVinjected	0.021108		Pinlet(Pa)	138534
				PVinjected	0.0221281		Pinlet(Pa)	1357250								PVinjected	0.0216141		Pinlet(Pa)	137602
				PVinjected	0.0226374		Pinlet(Pa)	1350140								PVinjected	0.0221766		Pinlet(Pa)	136591
				PVinjected	0.0231913		Pinlet(Pa)	1338910								PVinjected	0.0226952		Pinlet(Pa)	135883
				PVinjected	0.0237272		Pinlet(Pa)	1329420								PVinjected	0.0232316		Pinlet(Pa)	135193
				PVinjected	0.0242339		Pinlet(Pa)	1319490								PVinjected	0.023751		Pinlet(Pa)	134561
				PVinjected	0.0247828		Pinlet(Pa)	1309050								PVinjected	0.0242951		Pinlet(Pa)	133787
				PVinjected	0.0253432		Pinlet(Pa)	1301300								PVinjected	0.0248085		Pinlet(Pa)	132929
				PVinjected	0.025871		Pinlet(Pa)	1295000								PVinjected	0.0253173		Pinlet(Pa)	132245
				PVinjected	0.0263731		Pinlet(Pa)	1287140								PVinjected	0.0258319		Pinlet(Pa)	131470
				PVinjected	0.0268903		Pinlet(Pa)	1278300								PVinjected	0.0263932		Pinlet(Pa)	130779
				PVinjected	0.0274125		Pinlet(Pa)	1271330								PVinjected	0.0268859		Pinlet(Pa)	129939
				PVinjected	0.0279193		Pinlet(Pa)	1264310								PVinjected	0.0274229		Pinlet(Pa)	129213
				PVinjected	0.0284552		Pinlet(Pa)	1258330								PVinjected	0.0279657		Pinlet(Pa)	128713
				PVinjected	0.0289674		Pinlet(Pa)	1252270								PVinjected	0.0285107		Pinlet(Pa)	128011
				PVinjected	0.0295105		Pinlet(Pa)	1244550								PVinjected	0.0290093		Pinlet(Pa)	127381
				PVinjected	0.0300364		Pinlet(Pa)	1237330								PVinjected	0.029541		Pinlet(Pa)	126666
				PVinjected	0.0305442		Pinlet(Pa)	1229120								PVinjected	0.0300853		Pinlet(Pa)	126137
				PVinjected	0.0310505		Pinlet(Pa)	1221370								PVinjected	0.0305968		Pinlet(Pa)	125355
				PVinjected	0.0315586		Pinlet(Pa)	1214990								PVinjected	0.0311105		Pinlet(Pa)	124508
				PVinjected	0.0321392		Pinlet(Pa)	1207660								PVinjected	0.0316504		Pinlet(Pa)	123890
				PVinjected	0.032677		Pinlet(Pa)	1200720								PVinjected	0.0321698		Pinlet(Pa)	123175
				PVinjected	0.0332699		Pinlet(Pa)	1194110								PVinjected	0.0327076		Pinlet(Pa)	122196
				PVinjected	0.0338123		Pinlet(Pa)	1187580								PVinjected	0.0332201		Pinlet(Pa)	121413
				PVinjected	0.0343717		Pinlet(Pa)	1179830								PVinjected	0.0337865		Pinlet(Pa)	120878
				PVinjected	0.0349133		Pinlet(Pa)	1171970								PVinjected	0.0343343		Pinlet(Pa)	120387
				PVinjected	0.0354462		Pinlet(Pa)	1165780								PVinjected	0.0348662		Pinlet(Pa)	119582
				PVinjected	0.0360011		Pinlet(Pa)	1160240								PVinjected	0.0354201		Pinlet(Pa)	118838
				PVinjected	0.0365075		Pinlet(Pa)	1153880								PVinjected	0.0359391		Pinlet(Pa)	118259
				PVinjected	0.0370151		Pinlet(Pa)	1147000								PVinjected	0.0365213		Pinlet(Pa)	117518
				PVinjected	0.0375351		Pinlet(Pa)	1138350								PVinjected	0.037073		Pinlet(Pa)	116883
				PVinjected	0.0380335		Pinlet(Pa)	1132160								PVinjected	0.0376073		Pinlet(Pa)	116345
				PVinjected	0.0385984		Pinlet(Pa)	1125470								PVinjected	0.0381168		Pinlet(Pa)	115812
				PVinjected	0.0391676		Pinlet(Pa)	1118330								PVinjected	0.0386182		Pinlet(Pa)	115249
				PVinjected	0.0396782		Pinlet(Pa)	1110670								PVinjected	0.0391395		Pinlet(Pa)	114743
				PVinjected	0.0402202		Pinlet(Pa)	1103530								PVinjected	0.0396709		Pinlet(Pa)	114161
				PVinjected	0.0407604		Pinlet(Pa)	1094440								PVinjected	0.0401887		Pinlet(Pa)	113716
				PVinjected	0.041334		Pinlet(Pa)	1088360								PVinjected	0.0407219		Pinlet(Pa)	113067
				PVinjected	0.0418685		Pinlet(Pa)	1083480								PVinjected	0.0412695		Pinlet(Pa)	112549
				PVinjected	0.0424223		Pinlet(Pa)	1077480								PVinjected	0.0417991		Pinlet(Pa)	111614
				PVinjected	0.0430145		Pinlet(Pa)	1072830								PVinjected	0.0423262		Pinlet(Pa)	111046
				PVinjected	0.0435313		Pinlet(Pa)	1066580								PVinjected	0.0428431		Pinlet(Pa)	110169
				PVinjected	0.0440876		Pinlet(Pa)	1058910								PVinjected	0.0434004		Pinlet(Pa)	109495
				PVinjected	0.0445875		Pinlet(Pa)	1052310								PVinjected	0.0439041		Pinlet(Pa)	108944
				PVinjected	0.0451056		Pinlet(Pa)	1046720								PVinjected	0.0444654		Pinlet(Pa)	108480
				PVinjected	0.0456801		Pinlet(Pa)	1039460								PVinjected	0.0449972		Pinlet(Pa)	107953
				PVinjected	0.0462422		Pinlet(Pa)	1033670								PVinjected	0.0455634		Pinlet(Pa)	107275
				PVinjected	0.0467781		Pinlet(Pa)	1028880								PVinjected	0.0461287		Pinlet(Pa)	106531
				PVinjected	0.0473384		Pinlet(Pa)	1023010								PVinjected	0.0466001		Pinlet(Pa)	105997
				PVinjected	0.0478284		Pinlet(Pa)	1016470								PVinjected	0.0471635		Pinlet(Pa)	105462
				PVinjected	0.0483738		Pinlet(Pa)	1011310								PVinjected	0.0477235		Pinlet(Pa)	104657
				PVinjected	0.0488908		Pinlet(Pa)	1005210								PVinjected	0.0482846		Pinlet(Pa)	104024
				PVinjected	0.0494122		Pinlet(Pa)	999488								PVinjected	0.04879		Pinlet(Pa)	103375
				PVinjected	0.049986		Pinlet(Pa)	994117								PVinjected	0.0493391		Pinlet(Pa)	102744
				PVinjected	0.0505077		Pinlet(Pa)	988455								PVinjected	0.0498688		Pinlet(Pa)	102152
				PVinjected	0.0510258		Pinlet(Pa)	982449								PVinjected	0.0504389		Pinlet(Pa)	101442
				PVinjected	0.0516025		Pinlet(Pa)	974934								PVinjected	0.0509974		Pinlet(Pa)	100718
				PVinjected	0.0521632		Pinlet(Pa)	967677								PVinjected	0.0515635		Pinlet(Pa)	100022
				PVinjected	0.0527384		Pinlet(Pa)	960096								PVinjected	0.05209		Pinlet(Pa)	99231.5
				PVinjected	0.0532782		Pinlet(Pa)	952472								PVinjected	0.0526276		Pinlet(Pa)	98468.6
				PVinjected	0.0538644		Pinlet(Pa)	946950								PVinjected	0.0531809		Pinlet(Pa)	97844.7
				PVinjected	0.0543914		Pinlet(Pa)	940601								PVinjected	0.0537634		Pinlet(Pa)	96798.6
				PVinjected	0.0549418		Pinlet(Pa)	934197								PVinjected	0.0542648		Pinlet(Pa)	95768.2
				PVinjected	0.0554977		Pinlet(Pa)	929100								PVinjected	0.0548207		Pinlet(Pa)	94865.9
				PVinjected	0.0560286		Pinlet(Pa)	923327								PVinjected	0.055319		Pinlet(Pa)	93886.1
				PVinjected	0.0565691		Pinlet(Pa)	916458								PVinjected	0.0558577		Pinlet(Pa)	92934.6
				PVinjected	0.0571152		Pinlet(Pa)	910278								PVinjected	0.0564285		Pinlet(Pa)	91859.8
				PVinjected	0.0576376		Pinlet(Pa)	905076								PVinjected	0.0569772		Pinlet(Pa)	90902.1
				PVinjected	0.058151		Pinlet(Pa)	900205								PVinjected	0.0575064		Pinlet(Pa)	90232.6
				PVinjected	0.0586884		Pinlet(Pa)	893469								PVinjected	0.058057		Pinlet(Pa)	89271.2
				PVinjected	0.0592286		Pinlet(Pa)	887369								PVinjected	0.0585762		Pinlet(Pa)	88378.6
				PVinjected	0.0598281		Pinlet(Pa)	879310								PVinjected	0.059157		Pinlet(Pa)	87700.6
				PVinjected	0.0603651		Pinlet(Pa)	872471								PVinjected	0.0596763		Pinlet(Pa)	87040
				PVinjected	0.0609097		Pinlet(Pa)	866617								PVinjected	0.0602226		Pinlet(Pa)	86354.3
				PVinjected	0.0615013		Pinlet(Pa)	861703								PVinjected	0.0607532		Pinlet(Pa)	85541.7
				PVinjected	0.0620089		Pinlet(Pa)	857194								PVinjected	0.0612906		Pinlet(Pa)	84851.8
				PVinjected	0.0625707		Pinlet(Pa)	850291								PVinjected	0.061815		Pinlet(Pa)	84116
				PVinjected	0.0631052		Pinlet(Pa)	842893								PVinjected	0.0623542		Pinlet(Pa)	83316.5
				PVinjected	0.0635955		Pinlet(Pa)	837838								PVinjected	0.0628764		Pinlet(Pa)	82509.8
				PVinjected	0.0641172		Pinlet(Pa)	833695								PVinjected	0.0634735		Pinlet(Pa)	81577.9
				PVinjected	0.0646733		Pinlet(Pa)	828854								PVinjected	0.0640169		Pinlet(Pa)	80940.4
				PVinjected	0.065157		Pinlet(Pa)	824627								PVinjected	0.0645758		Pinlet(Pa)	79834.9
				PVinjected	0.0657092		Pinlet(Pa)	819162								PVinjected	0.0650996		Pinlet(Pa)	79165.4
				PVinjected	0.066214		Pinlet(Pa)	811334								PVinjected	0.0656178		Pinlet(Pa)	78203.2
				PVinjected	0.0667434		Pinlet(Pa)	805218								PVinjected	0.0661757		Pinlet(Pa)	77295.1
				PVinjected	0.067268		Pinlet(Pa)	798891								PVinjected	0.0667352		Pinlet(Pa)	76695.6
				PVinjected	0.0678226		Pinlet(Pa)	794737								PVinjected	0.0672199		Pinlet(Pa)	75753.1
				PVinjected	0.0683806		Pinlet(Pa)	788858								PVinjected	0.0677606		Pinlet(Pa)	74902.3
				PVinjected	0.0689564		Pinlet(Pa)	781152								PVinjected	0.0682739		Pinlet(Pa)	73985.6
				PVinjected	0.0694384		Pinlet(Pa)	775724								PVinjected	0.0688364		Pinlet(Pa)	72984.4
				PVinjected	0.0699767		Pinlet(Pa)	764313								PVinjected	0.0694055		Pinlet(Pa)	71994.1
				PVinjected	0.0705449		Pinlet(Pa)	753923								PVinjected	0.069927		Pinlet(Pa)	70699.6
				PVinjected	0.0710708		Pinlet(Pa)	745305								PVinjected	0.0704542		Pinlet(Pa)	69819.7
				PVinjected	0.0716037		Pinlet(Pa)	736395								PVinjected	0.0710138		Pinlet(Pa)	68812.2
				PVinjected	0.0721362		Pinlet(Pa)	729544								PVinjected	0.0715139		Pinlet(Pa)	67818.3
				PVinjected	0.0726968		Pinlet(Pa)	723421								PVinjected	0.0720163		Pinlet(Pa)	66966.1
				PVinjected	0.0732167		Pinlet(Pa)	716910								PVinjected	0.0725883		Pinlet(Pa)	65905.9
				PVinjected	0.0737456		Pinlet(Pa)	711531								PVinjected	0.0731135		Pinlet(Pa)	65186.8
				PVinjected	0.0742773		Pinlet(Pa)	707194								PVinjected	0.0736482		Pinlet(Pa)	64018.5
				PVinjected	0.074773		Pinlet(Pa)	702027								PVinjected	0.0741788		Pinlet(Pa)	63202.3
				PVinjected	0.0753171		Pinlet(Pa)	693910								PVinjected	0.0747476		Pinlet(Pa)	62207.5
				PVinjected	0.0758649		Pinlet(Pa)	687438								PVinjected	0.0753153		Pinlet(Pa)	61229.1
				PVinjected	0.0764009		Pinlet(Pa)	681119								PVinjected	0.0758634		Pinlet(Pa)	60466.4
				PVinjected	0.076935		Pinlet(Pa)	675992								PVinjected	0.0763758		Pinlet(Pa)	59584.8
				PVinjected	0.0774221		Pinlet(Pa)	670272								PVinjected	0.0769056		Pinlet(Pa)	58532.1
				PVinjected	0.0779773		Pinlet(Pa)	664958								PVinjected	0.0773778		Pinlet(Pa)	57776.3
				PVinjected	0.0785015		Pinlet(Pa)	659321								PVinjected	0.077929		Pinlet(Pa)	57091.3
				PVinjected	0.0790638		Pinlet(Pa)	652880								PVinjected	0.078428		Pinlet(Pa)	56170.7
				PVinjected	0.0795912		Pinlet(Pa)	646445								PVinjected	0.0789625		Pinlet(Pa)	55415.1
				PVinjected	0.0801529		Pinlet(Pa)	640604								PVinjected	0.0795022		Pinlet(Pa)	54761
				PVinjected	0.0806793		Pinlet(Pa)	635654								PVinjected	0.0800215		Pinlet(Pa)	54034.5
				PVinjected	0.0812055		Pinlet(Pa)	630606								PVinjected	0.0805915		Pinlet(Pa)	53262.2
				PVinjected	0.081757		Pinlet(Pa)	624173								PVinjected	0.0811349		Pinlet(Pa)	52320.4
				PVinjected	0.0823077		Pinlet(Pa)	618575								PVinjected	0.0816833		Pinlet(Pa)	51302.1
				PVinjected	0.0828242		Pinlet(Pa)	611737								PVinjected	0.0822034		Pinlet(Pa)	50693.4
				PVinjected	0.0833314		Pinlet(Pa)	605451								PVinjected	0.0827467		Pinlet(Pa)	49717.9
				PVinjected	0.0838546		Pinlet(Pa)	600643								PVinjected	0.0832846		Pinlet(Pa)	48996.3
				PVinjected	0.0843939		Pinlet(Pa)	595338								PVinjected	0.0838513		Pinlet(Pa)	47756.7
				PVinjected	0.0848979		Pinlet(Pa)	590823								PVinjected	0.0843866		Pinlet(Pa)	46935.6
				PVinjected	0.0854639		Pinlet(Pa)	586499								PVinjected	0.0849289		Pinlet(Pa)	45823.5
				PVinjected	0.085976		Pinlet(Pa)	581521								PVinjected	0.0854194		Pinlet(Pa)	45044.5
				PVinjected	0.0865191		Pinlet(Pa)	575752								PVinjected	0.0859797		Pinlet(Pa)	43841
				PVinjected	0.0870514		Pinlet(Pa)	569896								PVinjected	0.0865071		Pinlet(Pa)	42913.2
				PVinjected	0.0875783		Pinlet(Pa)	564211								PVinjected	0.0870839		Pinlet(Pa)	42171.5
				PVinjected	0.0881486		Pinlet(Pa)	559272								PVinjected	0.0876666		Pinlet(Pa)	41379.5
				PVinjected	0.0887314		Pinlet(Pa)	554225								PVinjected	0.088222		Pinlet(Pa)	40494.2
				PVinjected	0.0892795		Pinlet(Pa)	550371								PVinjected	0.0887909		Pinlet(Pa)	39852.1
				PVinjected	0.0898031		Pinlet(Pa)	544659								PVinjected	0.0893604		Pinlet(Pa)	39051.4
				PVinjected	0.0903343		Pinlet(Pa)	538597								PVinjected	0.08986		Pinlet(Pa)	38221.6
				PVinjected	0.0909304		Pinlet(Pa)	533216								PVinjected	0.0903628		Pinlet(Pa)	37524.5
				PVinjected	0.0915112		Pinlet(Pa)	527289								PVinjected	0.0909184		Pinlet(Pa)	36871.8
				PVinjected	0.0920349		Pinlet(Pa)	520580								PVinjected	0.0914159		Pinlet(Pa)	36144.5
				PVinjected	0.0925716		Pinlet(Pa)	514542								PVinjected	0.09196		Pinlet(Pa)	35428.3
				PVinjected	0.0930951		Pinlet(Pa)	509629								PVinjected	0.0925128		Pinlet(Pa)	34797.1
				PVinjected	0.0936381		Pinlet(Pa)	504552								PVinjected	0.0930976		Pinlet(Pa)	33939.1
				PVinjected	0.0942064		Pinlet(Pa)	499535								PVinjected	0.0936461		Pinlet(Pa)	33220.4
				PVinjected	0.09477		Pinlet(Pa)	493814								PVinjected	0.0942329		Pinlet(Pa)	32100.4
				PVinjected	0.0953185		Pinlet(Pa)	488762								PVinjected	0.0947652		Pinlet(Pa)	31624.8
				PVinjected	0.0958452		Pinlet(Pa)	483057								PVinjected	0.0952929		Pinlet(Pa)	30953.5
				PVinjected	0.0963991		Pinlet(Pa)	475435								PVinjected	0.0958293		Pinlet(Pa)	30455.8
				PVinjected	0.096962		Pinlet(Pa)	466600								PVinjected	0.0963412		Pinlet(Pa)	29752.2
				PVinjected	0.0974828		Pinlet(Pa)	461613								PVinjected	0.096947		Pinlet(Pa)	28667.3
				PVinjected	0.0980454		Pinlet(Pa)	455253								PVinjected	0.0974853		Pinlet(Pa)	27875
				PVinjected	0.0985458		Pinlet(Pa)	448075								PVinjected	0.0980683		Pinlet(Pa)	27152.7
				PVinjected	0.0990826		Pinlet(Pa)	441874								PVinjected	0.0985991		Pinlet(Pa)	26835.7
				PVinjected	0.0996635		Pinlet(Pa)	436563								PVinjected	0.0991714		Pinlet(Pa)	26220.2
				PVinjected	0.100183		Pinlet(Pa)	428790								PVinjected	0.0996821		Pinlet(Pa)	25677.2
				PVinjected	0.100749		Pinlet(Pa)	421595								PVinjected	0.10024		Pinlet(Pa)	25064.4
				PVinjected	0.101258		Pinlet(Pa)	415175								PVinjected	0.100775		Pinlet(Pa)	24357.6
				PVinjected	0.101797		Pinlet(Pa)	405255								PVinjected	0.101311		Pinlet(Pa)	23773.7
				PVinjected	0.102323		Pinlet(Pa)	398093								PVinjected	0.101839		Pinlet(Pa)	23182.4
				PVinjected	0.102934		Pinlet(Pa)	389416								PVinjected	0.102339		Pinlet(Pa)	22609.1
				PVinjected	0.103455		Pinlet(Pa)	381530								PVinjected	0.102837		Pinlet(Pa)	21878
				PVinjected	0.104023		Pinlet(Pa)	371054								PVinjected	0.103377		Pinlet(Pa)	21000.1
				PVinjected	0.104579		Pinlet(Pa)	363306								PVinjected	0.103928		Pinlet(Pa)	20290.7
				PVinjected	0.105126		Pinlet(Pa)	352221								PVinjected	0.104454		Pinlet(Pa)	19704.1
				PVinjected	0.105672		Pinlet(Pa)	343746								PVinjected	0.104997		Pinlet(Pa)	19115.2
				PVinjected	0.106227		Pinlet(Pa)	332721								PVinjected	0.105524		Pinlet(Pa)	18267.8
				PVinjected	0.106804		Pinlet(Pa)	324451								PVinjected	0.106035		Pinlet(Pa)	17538.7
				PVinjected	0.107405		Pinlet(Pa)	317448								PVinjected	0.106579		Pinlet(Pa)	16701
				PVinjected	0.107947		Pinlet(Pa)	305916								PVinjected	0.107092		Pinlet(Pa)	16012.4
				PVinjected	0.1085		Pinlet(Pa)	293798								PVinjected	0.107628		Pinlet(Pa)	15254.5
				PVinjected	0.109028		Pinlet(Pa)	284497								PVinjected	0.108138		Pinlet(Pa)	14272.7
				PVinjected	0.10956		Pinlet(Pa)	276503								PVinjected	0.108636		Pinlet(Pa)	13549.4
				PVinjected	0.110091		Pinlet(Pa)	271078								PVinjected	0.109193		Pinlet(Pa)	12282.7
				PVinjected	0.110641		Pinlet(Pa)	264790								PVinjected	0.109676		Pinlet(Pa)	11489.5
				PVinjected	0.111242		Pinlet(Pa)	257546								PVinjected	0.110222		Pinlet(Pa)	10830.5
				PVinjected	0.11179		Pinlet(Pa)	246550								PVinjected	0.110808		Pinlet(Pa)	9907.24
				PVinjected	0.112363		Pinlet(Pa)	238019								PVinjected	0.111306		Pinlet(Pa)	9100.26
				PVinjected	0.112889		Pinlet(Pa)	228898								PVinjected	0.111862		Pinlet(Pa)	7634.07
				PVinjected	0.113408		Pinlet(Pa)	220586								PVinjected	0.112364		Pinlet(Pa)	6944.57
				PVinjected	0.113981		Pinlet(Pa)	206879								PVinjected	0.112878		Pinlet(Pa)	5296.85
				PVinjected	0.114503		Pinlet(Pa)	199511								PVinjected	0.13831		Pinlet(Pa)	2730
				PVinjected	0.115013		Pinlet(Pa)	192484								PVinjected	0.168673		Pinlet(Pa)	2730
				PVinjected	0.115577		Pinlet(Pa)	185228								PVinjected	0.199294		Pinlet(Pa)	2730
				PVinjected	0.116125		Pinlet(Pa)	179563								PVinjected	0.230996		Pinlet(Pa)	2730
				PVinjected	0.116664		Pinlet(Pa)	173832								PVinjected	0.265099		Pinlet(Pa)	2730
				PVinjected	0.117169		Pinlet(Pa)	163878								PVinjected	0.298893		Pinlet(Pa)	2730
				PVinjected	0.117694		Pinlet(Pa)	156980								PVinjected	0.332418		Pinlet(Pa)	2730
				PVinjected	0.118217		Pinlet(Pa)	148359								PVinjected	0.365849		Pinlet(Pa)	2730
				PVinjected	0.118763		Pinlet(Pa)	139063								PVinjected	0.401033		Pinlet(Pa)	2730
				PVinjected	0.119287		Pinlet(Pa)	127427								PVinjected	0.437331		Pinlet(Pa)	2730
				PVinjected	0.119839		Pinlet(Pa)	117382								PVinjected	0.473279		Pinlet(Pa)	2730
				PVinjected	0.120416		Pinlet(Pa)	103128								PVinjected	0.506256		Pinlet(Pa)	2730
				PVinjected	0.120957		Pinlet(Pa)	86102.8								PVinjected	0.537931		Pinlet(Pa)	2730
				PVinjected	0.121492		Pinlet(Pa)	63074.4								PVinjected	0.57188		Pinlet(Pa)	2730
				PVinjected	0.142039		Pinlet(Pa)	26244.7								PVinjected	0.605497		Pinlet(Pa)	2730
				PVinjected	0.165867		Pinlet(Pa)	26248.9								PVinjected	0.639878		Pinlet(Pa)	2730
				PVinjected	0.192223		Pinlet(Pa)	26242.4								PVinjected	0.671509		Pinlet(Pa)	2730
				PVinjected	0.21724		Pinlet(Pa)	26240.9								PVinjected	0.701592		Pinlet(Pa)	2730
				PVinjected	0.241769		Pinlet(Pa)	26241.9								PVinjected	0.735343		Pinlet(Pa)	2730
				PVinjected	0.265631		Pinlet(Pa)	26233.1								PVinjected	0.769123		Pinlet(Pa)	2730
				PVinjected	0.29146		Pinlet(Pa)	26227.1								PVinjected	0.803892		Pinlet(Pa)	2730
				PVinjected	0.319471		Pinlet(Pa)	26218.6								PVinjected	0.838012		Pinlet(Pa)	2730
				PVinjected	0.345863		Pinlet(Pa)	26210								PVinjected	0.869919		Pinlet(Pa)	2730
				PVinjected	0.372223		Pinlet(Pa)	26195.3								PVinjected	0.903203		Pinlet(Pa)	2730
				PVinjected	0.402085		Pinlet(Pa)	26201.6								PVinjected	0.933386		Pinlet(Pa)	2730
				PVinjected	0.426707		Pinlet(Pa)	26195.7								PVinjected	0.966936		Pinlet(Pa)	2730
				PVinjected	0.453859		Pinlet(Pa)	26189.8								PVinjected	0.994965		Pinlet(Pa)	2730
				PVinjected	0.479497		Pinlet(Pa)	26191.1								PVinjected	1.02611		Pinlet(Pa)	2730
				PVinjected	0.505728		Pinlet(Pa)	26172.2								PVinjected	1.05465		Pinlet(Pa)	2730
				PVinjected	0.531098		Pinlet(Pa)	26166.4								PVinjected	1.08651		Pinlet(Pa)	2730
				PVinjected	0.557098		Pinlet(Pa)	26171.7								PVinjected	1.119		Pinlet(Pa)	2730
				PVinjected	0.582164		Pinlet(Pa)	26173.4								PVinjected	1.14991		Pinlet(Pa)	2730
				PVinjected	0.606613		Pinlet(Pa)	26164.4								PVinjected	1.17978		Pinlet(Pa)	2730
				PVinjected	0.630995		Pinlet(Pa)	26157.3								PVinjected	1.20903		Pinlet(Pa)	2730
				PVinjected	0.655905		Pinlet(Pa)	26140.1								PVinjected	1.23758		Pinlet(Pa)	2730
				PVinjected	0.67781		Pinlet(Pa)	26128.2								PVinjected	1.26666		Pinlet(Pa)	2730.61
				PVinjected	0.701719		Pinlet(Pa)	26112.7								PVinjected	1.2985		Pinlet(Pa)	2730.42
				PVinjected	0.72384		Pinlet(Pa)	26106								PVinjected	1.32946		Pinlet(Pa)	2729.56
				PVinjected	0.748151		Pinlet(Pa)	26084.6								PVinjected	1.36262		Pinlet(Pa)	2730.81
				PVinjected	0.770127		Pinlet(Pa)	26068.3								PVinjected	1.39234		Pinlet(Pa)	2730.78
				PVinjected	0.792139		Pinlet(Pa)	26066.4								PVinjected	1.42235		Pinlet(Pa)	2730.98
				PVinjected	0.813733		Pinlet(Pa)	26051.3								PVinjected	1.45282		Pinlet(Pa)	2730.73
				PVinjected	0.832886		Pinlet(Pa)	26040.3								PVinjected	1.48293		Pinlet(Pa)	2731.07
				PVinjected	0.852537		Pinlet(Pa)	26020.3								PVinjected	1.51373		Pinlet(Pa)	2730.75
				PVinjected	0.870688		Pinlet(Pa)	25995.1								PVinjected	1.54513		Pinlet(Pa)	2730.2
				PVinjected	0.888871		Pinlet(Pa)	25975.2								PVinjected	1.57597		Pinlet(Pa)	2731.4
				PVinjected	0.907925		Pinlet(Pa)	25944								PVinjected	1.60623		Pinlet(Pa)	2730.42
				PVinjected	0.926394		Pinlet(Pa)	25927.6								PVinjected	1.63531		Pinlet(Pa)	2731.16
				PVinjected	0.943267		Pinlet(Pa)	25911.9								PVinjected	1.66881		Pinlet(Pa)	2730.59
				PVinjected	0.960679		Pinlet(Pa)	25882.2								PVinjected	1.70074		Pinlet(Pa)	2731.55
				PVinjected	0.978355		Pinlet(Pa)	25864.4								PVinjected	1.7322		Pinlet(Pa)	2730.36
				PVinjected	0.993336		Pinlet(Pa)	25799.1								PVinjected	1.76391		Pinlet(Pa)	2731.32
				PVinjected	1.0077		Pinlet(Pa)	25782.8								PVinjected	1.79695		Pinlet(Pa)	2730.44
				PVinjected	1.02188		Pinlet(Pa)	25756.7								PVinjected	1.82855		Pinlet(Pa)	2730.65
																PVinjected	1.85796		Pinlet(Pa)	2729.7
																PVinjected	1.89		Pinlet(Pa)	2730.29
																PVinjected	1.92315		Pinlet(Pa)	2730.83
																PVinjected	1.95289		Pinlet(Pa)	2731
																PVinjected	1.98393		Pinlet(Pa)	2731.18
																PVinjected	2.0141		Pinlet(Pa)	2730.47
																PVinjected	2.04333		Pinlet(Pa)	2730.44
																PVinjected	2.07243		Pinlet(Pa)	2730.16
